# Supplementary material for: Genomic prediction in early selection stages using multi-year data in a hybrid rye breeding program
Source: PubMed Central journal article supplement (PMC5452640; doi:10.1186/s12863-017-0512-8), 2017-05-31
Supplement: 12863_2017_512_MOESM1_ESM.pdf [file 12863_2017_512_MOESM1_ESM.pdf]

# Genomic prediction in early selection stages using multi-year data in a hybrid rye breeding program

Angela-Maria Bernal-Vasquez<sup>1</sup>    Andres Gordillo<sup>2</sup>    Malthe Schmidt<sup>2</sup>  
Hans-Peter Piepho<sup>1,3</sup>

## Additional file 1

Journal: BMC Genetics

---

<sup>1</sup>Biostatistics Unit, Institute of Crop Science, University of Hohenheim, Fruwirthstrasse 23, 70599 Stuttgart, Germany

<sup>2</sup>KWS-LOCHOW GMBH, Ferdinand-von-Lochow-Strasse 5, 29303, Bergen, Germany

<sup>3</sup>Corresponding author. Tel.: +49 711 459 22386; fax: +49 711 459 22297.

E-mail address: piepho@uni-hohenheim.de.

# 1 Complete selection breeding program

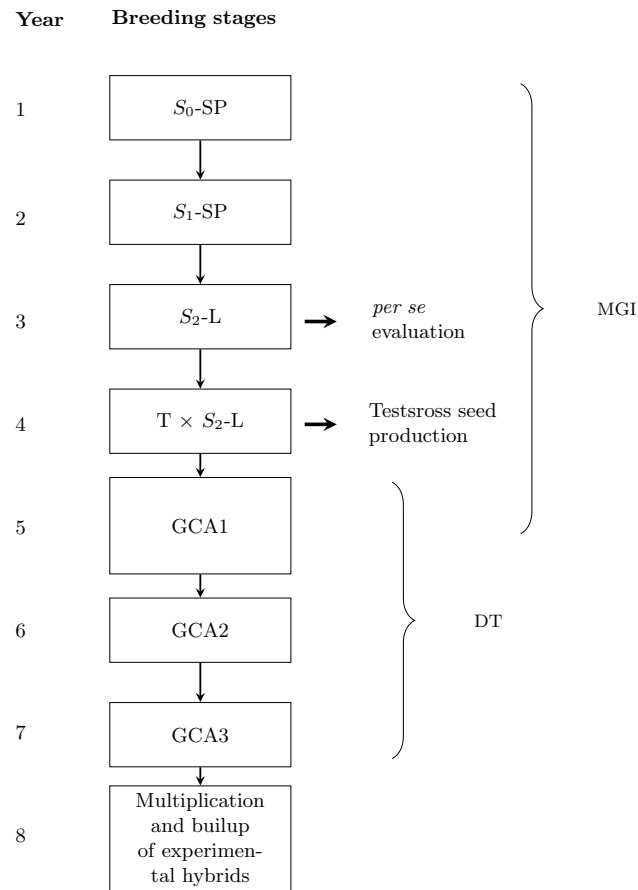

Figure S1: **Flow diagram of a complete selection cycle of the pollen parent pool.**  $S_x$  = selfing generation  $x$ , SP = single plant, L = line, T = tester, GCA $X$  = general combining ability  $X$  trial, MGI = minimum generation interval, DT = datasets used

## 2 Diagrams of prediction scenarios

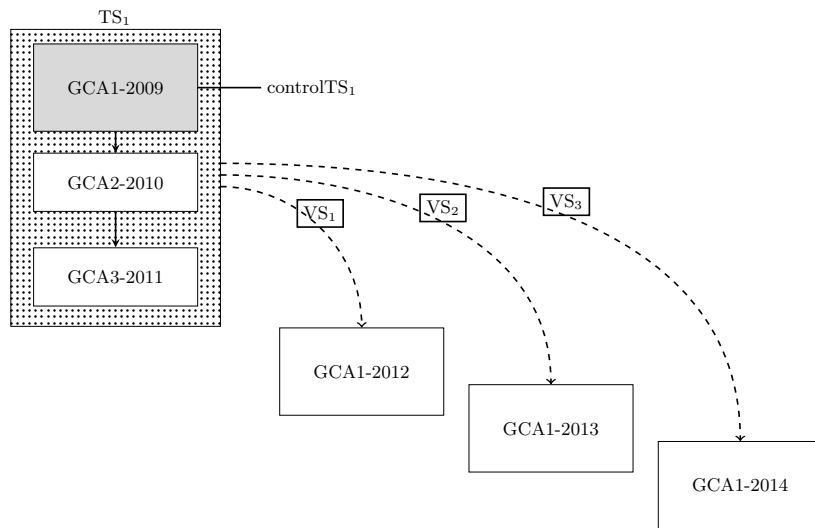

Figure S2: **Diagram of the first scenario.**  $TS_1$  with dotted background and control set (control $TS_1$ ) filled in gray. Arrows represent the prediction goals  $VS_1$ ,  $VS_2$  and  $VS_3$ .

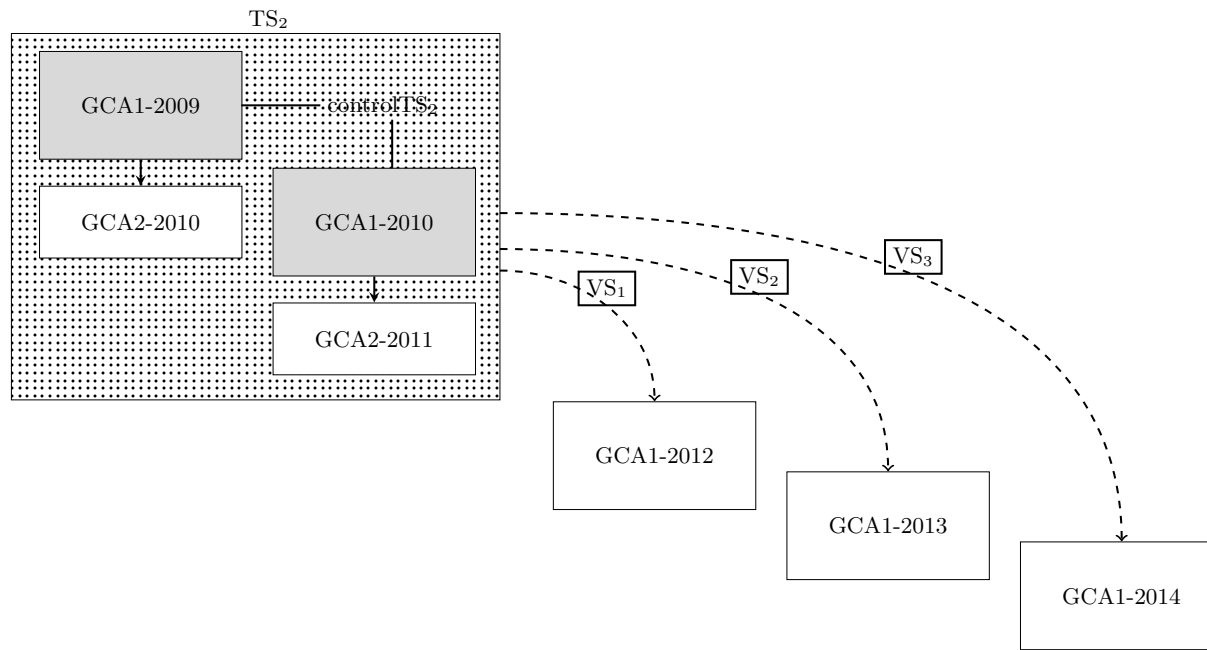

Figure S3: **Diagram of the second scenario.**  $TS_2$  with dotted background and control set ( $controlTS_2$ ) filled in gray. Arrows represent the prediction goals  $VS_1$ ,  $VS_2$  and  $VS_3$ .

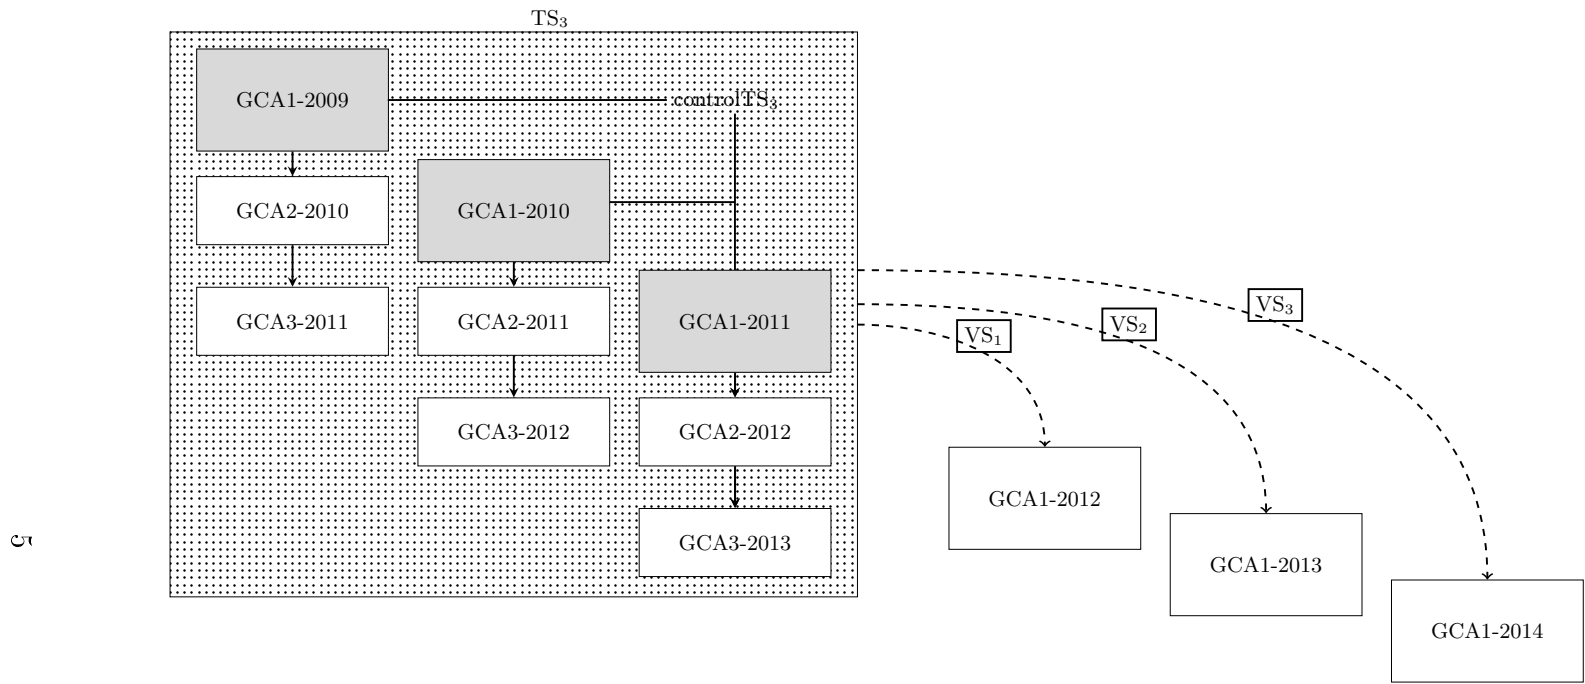

Figure S4: **Diagram of the third scenario.**  $TS_3$  with dotted background and control set ( $controlTS_3$ ) filled in gray. Arrows represent the prediction goals  $VS_1$ ,  $VS_2$  and  $VS_3$ .

### 3 Number of locations and Location-year combinations

Table S1: Number of locations ( $L$ ) and year-location combinations ( $YL$ ) for the German (GER) and the Polish (PL) datasets. Last column shows the ratio between  $YL$  and  $L$

| Program | TS              | VS              | $L$ | $YL$ | $YL/L$ |
|---------|-----------------|-----------------|-----|------|--------|
| GER     | TS <sub>1</sub> | VS <sub>1</sub> | 25  | 28   | 1.1    |
| GER     | TS <sub>1</sub> | VS <sub>2</sub> | 24  | 31   | 1.3    |
| GER     | TS <sub>1</sub> | VS <sub>3</sub> | 23  | 32   | 1.4    |
| PL      | TS <sub>1</sub> | VS <sub>1</sub> | 23  | 23   | 1.0    |
| PL      | TS <sub>1</sub> | VS <sub>2</sub> | 23  | 25   | 1.1    |
| PL      | TS <sub>1</sub> | VS <sub>3</sub> | 22  | 26   | 1.2    |
| GER     | TS <sub>2</sub> | VS <sub>1</sub> | 22  | 31   | 1.4    |
| GER     | TS <sub>2</sub> | VS <sub>2</sub> | 21  | 29   | 1.4    |
| GER     | TS <sub>2</sub> | VS <sub>3</sub> | 20  | 30   | 1.5    |
| PL      | TS <sub>2</sub> | VS <sub>1</sub> | 21  | 25   | 1.2    |
| PL      | TS <sub>2</sub> | VS <sub>2</sub> | 20  | 23   | 1.2    |
| PL      | TS <sub>2</sub> | VS <sub>3</sub> | 19  | 24   | 1.3    |
| GER     | TS <sub>3</sub> | VS <sub>1</sub> | 30  | 55   | 1.8    |
| GER     | TS <sub>3</sub> | VS <sub>2</sub> | 29  | 56   | 1.9    |
| GER     | TS <sub>3</sub> | VS <sub>3</sub> | 29  | 65   | 2.2    |
| PL      | TS <sub>3</sub> | VS <sub>1</sub> | 29  | 49   | 1.7    |
| PL      | TS <sub>3</sub> | VS <sub>2</sub> | 28  | 50   | 1.8    |
| PL      | TS <sub>3</sub> | VS <sub>3</sub> | 28  | 59   | 2.1    |

TS<sub>1</sub>: GCA1-2009 + GCA2-2010 + GCA3-2011, TS<sub>2</sub>: GCA1-2009 + GCA2-2010 + GCA1-2010 + GCA2-2011, TS<sub>3</sub>: GCA1-2009 + GCA2-2010 + GCA3-2011 + GCA1-2010 + GCA2-2011 + GCA3-2012 + GCA1-2011 + GCA2-2012 + GCA3-2013, VS<sub>1</sub>: GCA1-2012, VS<sub>2</sub>: GCA1-2013, VS<sub>3</sub>: GCA1-2014.

## 4 Asymptotic correlation and variance-covariance matrices

Table S2: Asymptotic correlation (lower diagonal) and covariance (upper diagonal) matrix for TS<sub>1</sub>-VS<sub>3</sub> German and Polish (GER&PL) dataset. TS<sub>1</sub>: GCA1-2009 + GCA2-2010 + GCA3-2011, VS<sub>3</sub>: GCA1-2014. The factors are genotypes (*G*), testers (*T*), years (*Y*) and locations (*L*).

|             | <i>G</i>       | <i>GY</i>      | <i>Y</i> | <i>L</i>       | <i>GL</i>      | <i>TL</i> | <i>GTL</i>     | <i>GT</i>      | <i>TY</i> | <i>GTY</i>     | <i>YL</i> | <i>GYL</i>     | <i>TYL</i> | <i>GTYL</i> |
|-------------|----------------|----------------|----------|----------------|----------------|-----------|----------------|----------------|-----------|----------------|-----------|----------------|------------|-------------|
| <i>G</i>    | 1              | -0.4388        | 0.0102   | 0.0048         | -0.0258        | 0         | 0.0016         | -0.03          | 0         | 0.0279         | -0.0008   | 0.0241         | -0.0003    | -0.0024     |
| <i>GY</i>   | <b>-0.8747</b> | 1              | -0.0101  | -0.0069        | 0.0247         | 0         | -0.002         | 0.027          | 0         | -0.0314        | 0.0023    | -0.0291        | 0.0005     | 0.0049      |
| <i>Y</i>    | 0.4842         | <b>-0.4283</b> | 1        | -103.93        | 0.0367         | 0         | -0.0074        | 0.0442         | 0         | -0.0447        | -73.5891  | -0.0388        | 0.0507     | 0.0079      |
| <i>L</i>    | 0.0001         | -0.0001        | -0.0219  | 1              | -0.0241        | 0         | -0.0002        | -0.0025        | 0         | 0.0025         | -682.792  | 0.0226         | -1.7145    | 0.0013      |
| <i>GL</i>   | -0.0553        | 0.0596         | 0.0009   | -0.0005        | 1              | 0         | -0.163         | 0.0094         | 0         | -0.0093        | -0.015    | -0.3634        | -0.0003    | 0.1556      |
| <i>TL</i>   | -              | -              | -        | -              | -              | 1         | 0              | 0              | 0         | 0              | 0         | 0              | 0          | 0           |
| <i>GTL</i>  | 0.0022         | -0.0032        | -0.0001  | 0              | <b>-0.2809</b> | -         | 1              | -0.064         | 0         | 0.0629         | 0.0004    | 0.1544         | 0.0014     | -0.8584     |
| <i>GT</i>   | -0.1106        | 0.112          | 0.0019   | -0.0001        | 0.7852         | -         | <b>-0.1898</b> | 1              | 0         | -0.1247        | -0.0056   | -0.0095        | 0.0016     | 0.0629      |
| <i>TY</i>   | -              | -              | -        | -              | -              | -         | -              | -              | 1         | 0              | 0         | 0              | 0          | 0           |
| <i>GTY</i>  | 0.1022         | -0.129         | -0.0019  | 0.0001         | -0.0413        | -         | 0.1849         | <b>-0.9491</b> | 0         | 1              | 0.006     | 0.012          | -0.0016    | -0.0682     |
| <i>YL</i>   | -3E-05         | 0.0001         | -0.0326  | <b>-0.2556</b> | -0.0007        | -         | 1.2E-05        | -0.0004        | 0         | 0.0005         | 1         | 0.0135         | -10.6168   | -0.0001     |
| <i>GYL</i>  | 0.0505         | -0.0686        | -0.001   | 0.0005         | <b>-0.9229</b> | -         | 0.2601         | -0.0414        | 0         | 0.0519         | 0.0006    | 1              | 0.0008     | -0.1798     |
| <i>TYL</i>  | -0.0001        | 0.0002         | 0.0002   | -0.0058        | -0.0001        | -         | 0.0004         | 0.0012         | 0         | -0.0011        | -0.0759   | 0.0003         | 1          | -0.0021     |
| <i>GTYL</i> | -0.0033        | 0.0078         | 0.0001   | 1.8E-05        | 0.2665         | -         | <b>-0.9758</b> | 0.1851         | 0         | <b>-0.1991</b> | 0         | <b>-0.3010</b> | -0.0006    | 1           |

Table S3: Asymptotic correlation (lower diagonal) and covariance (upper diagonal) matrix for TS<sub>1</sub>-VS<sub>2</sub> German and Polish (GER&PL) dataset. TS<sub>1</sub>: GCA1-2009 + GCA2-2010 + GCA3-2011, VS<sub>2</sub>: GCA1-2013. The factors are genotypes (*G*), testers (*T*), years (*Y*) and locations (*L*).

|             | <i>G</i>       | <i>GY</i>      | <i>Y</i> | <i>L</i>       | <i>GL</i>      | <i>TL</i> | <i>GTL</i>     | <i>GT</i>      | <i>TY</i> | <i>GTY</i> | <i>YL</i> | <i>GYL</i> | <i>TYL</i> | <i>GTYL</i> |
|-------------|----------------|----------------|----------|----------------|----------------|-----------|----------------|----------------|-----------|------------|-----------|------------|------------|-------------|
| <i>G</i>    | 1              | -0.2593        | 0.0102   | -0.0003        | -0.0131        | 0         | 0.0045         | -0.0564        | 0         | 0.0509     | 0.0033    | 0.0125     | -0.0008    | -0.0043     |
| <i>GY</i>   | <b>-0.9082</b> | 1              | -0.0097  | -0.0005        | 0.0131         | 0         | -0.0042        | 0.0499         | 0         | -0.0546    | -0.0039   | -0.0167    | 0.0009     | 0.0066      |
| <i>Y</i>    | 0.3735         | <b>-0.3420</b> | 1        | -200.189       | 0.0207         | 0         | -0.0004        | 0.0607         | 0         | -0.0639    | -71.0256  | -0.023     | 0.0358     | 0.0018      |
| <i>L</i>    | 0.0000         | 0.0000         | -0.0454  | 1              | -0.0231        | 0         | -0.0026        | 0.0027         | 0         | -0.0021    | -1206.04  | 0.0211     | 0.0789     | 0.0038      |
| <i>GL</i>   | -0.051         | 0.0531         | 0.0007   | -0.0007        | 1              | 0         | -0.1314        | 0.0081         | 0         | -0.0084    | -0.0095   | -0.2118    | -0.0003    | 0.1268      |
| <i>TL</i>   | -              | -              | -        | -              | -              | 1         | 0              | 0              | 0         | 0          | 0         | 0          | 0          | 0           |
| <i>GTL</i>  | 0.0095         | -0.0092        | 0.0000   | 0.0000         | <b>-0.3215</b> | -         | 1              | -0.0539        | 0         | 0.0529     | 0.0016    | 0.128      | 0.0012     | -0.7415     |
| <i>GT</i>   | -0.238         | 0.2191         | 0.0021   | 0.0001         | 0.6708         | -         | -0.1431        | 1              | 0         | -0.1772    | -0.0112   | -0.0095    | 0.0028     | 0.0536      |
| <i>TY</i>   | -              | -              | -        | -              | -              | -         | -              | -              | 1         | 0          | 0         | 0          | 0          | 0           |
| <i>GTY</i>  | 0.2171         | -0.2420        | -0.0022  | -0.0001        | -0.0415        | -         | 0.1419         | <b>-0.9470</b> | -         | 1          | 0.0112    | 0.0107     | -0.0027    | -0.0578     |
| <i>YL</i>   | 0.0001         | -0.0002        | -0.0217  | <b>-0.3748</b> | -0.0004        | -         | 3.8E-05        | -0.0005        | -         | 0.0005     | 1         | 0.0094     | -14.4578   | -0.0015     |
| <i>GYL</i>  | 0.0459         | -0.0638        | -0.0007  | 0.0006         | <b>-0.8986</b> | -         | 0.2956         | -0.0436        | -         | 0.0497     | 0.0004    | 1          | 0.0008     | -0.1544     |
| <i>TYL</i>  | -0.0003        | 0.0004         | 0.0001   | 0.0003         | -0.0001        | -         | 0.0003         | 0.0014         | -         | -0.0014    | -0.0664   | 0.0003     | 1          | -0.0019     |
| <i>GTYL</i> | -0.009         | 0.0144         | 0.0000   | 0.0001         | 0.3059         | -         | <b>-0.9736</b> | 0.1403         | -         | -0.1527    | 0.0000    | -0.3515    | -0.0005    | 1           |

Table S4: Asymptotic correlation (lower diagonal) and covariance (upper diagonal) matrix for TS<sub>1</sub>-VS<sub>1</sub>:GCA1-2012 German and Polish (GER&PL) dataset. TS<sub>1</sub>: GCA1-2009 + GCA2-2010 + GCA3-2011, VS<sub>1</sub>: GCA1-2012. The factors are genotypes (*G*), testers (*T*), years (*Y*) and locations (*L*).

|             | <i>G</i> | <i>GY</i> | <i>Y</i> | <i>L</i>       | <i>GL</i> | <i>TL</i>      | <i>GTL</i>     | <i>GT</i>      | <i>TY</i> | <i>GTY</i> | <i>YL</i> | <i>GYL</i> | <i>TYL</i> | <i>GTYL</i> |
|-------------|----------|-----------|----------|----------------|-----------|----------------|----------------|----------------|-----------|------------|-----------|------------|------------|-------------|
| <i>G</i>    | 1        | 0         | 0        | 0              | 0         | 0              | 0              | 0              | 0         | 0          | 0         | 0          | 0          | 0           |
| <i>GY</i>   | -        | 1         | -0.0042  | 0.0062         | 0         | -0.0006        | 0.0035         | -0.0008        | 0         | -0.0074    | -0.0003   | -0.0076    | 0.0004     | 0           |
| <i>Y</i>    | -        | -0.0002   | 1        | -71.8508       | 0         | 11.8454        | 0.0008         | 0.1002         | 0         | -0.0979    | -40.1089  | -0.0006    | -11.9180   | 0           |
| <i>L</i>    | -        | 0.0003    | -0.0224  | 1              | 0         | 4.5978         | -0.0015        | -0.0023        | 0         | 0.0026     | -357.1928 | -0.0009    | -5.6630    | 0           |
| <i>GL</i>   | -        | -         | -        | -              | 1         | 0              | 0              | 0              | 0         | 0          | 0         | 0          | 0          | 0           |
| <i>TL</i>   | -        | -0.0001   | 0.0158   | 0.0055         | -         | 1              | -0.0028        | -0.0194        | 0         | 0.0202     | -23.6140  | 0.0018     | -182.2474  | 0           |
| <i>GTL</i>  | -        | 0.0546    | 0.0001   | -0.0001        | -         | -0.0010        | 1              | -0.0027        | 0         | -0.0044    | 0.0023    | -0.0240    | 0.0005     | 0           |
| <i>GT</i>   | -        | -0.0063   | 0.0049   | -0.0001        | -         | -0.0036        | -0.0371        | 1              | 0         | -0.1423    | -0.0021   | 0.0016     | 0.0207     | 0           |
| <i>TY</i>   | -        | -         | -        | -              | -         | -              | -              | -              | 1         | 0          | 0         | 0          | 0          | 0           |
| <i>GTY</i>  | -        | -0.0557   | -0.0046  | 0.0001         | -         | 0.0037         | -0.0571        | <b>-0.9440</b> | -         | 1          | 0.0018    | 0.0015     | -0.0210    | 0           |
| <i>YL</i>   | -        | 0.0000    | -0.0268  | <b>-0.2138</b> | -         | -0.0605        | 0.0004         | -0.0002        | -         | 0.0002     | 1         | -0.0027    | 12.0806    | 0           |
| <i>GYL</i>  | -        | -0.1057   | -0.0001  | -0.0001        | -         | 0.0006         | <b>-0.5756</b> | 0.0196         | -         | 0.0173     | -0.0004   | 1          | -0.0003    | 0           |
| <i>TYL</i>  | -        | 0.0001    | -0.0163  | -0.0069        | -         | <b>-0.9551</b> | 0.0002         | 0.0040         | -         | -0.0039    | 0.0317    | -0.0001    | 1          | 0           |
| <i>GTYL</i> | -        | -         | -        | -              | -         | -              | -              | -              | -         | -          | -         | -          | -          | 1           |

Table S5: Asymptotic correlation (lower diagonal) and covariance (upper diagonal) matrix for TS<sub>2</sub>-VS<sub>3</sub>:GCA1-2014 German and Polish (GER&PL) dataset. TS<sub>2</sub>: GCA1-2009 + GCA2-2010 + GCA1-2010 + GCA2-2011, VS<sub>3</sub>: GCA1-2014. The factors are genotypes (*G*), testers (*T*), years (*Y*) and locations (*L*).

|             | <i>G</i>       | <i>GY</i>      | <i>Y</i> | <i>L</i>       | <i>GL</i>      | <i>TL</i> | <i>GTL</i>     | <i>GT</i>      | <i>TY</i> | <i>GTY</i>     | <i>YL</i> | <i>GYL</i>     | <i>TYL</i> | <i>GTYL</i> |
|-------------|----------------|----------------|----------|----------------|----------------|-----------|----------------|----------------|-----------|----------------|-----------|----------------|------------|-------------|
| <i>G</i>    | 1              | -0.1791        | 0.0089   | -0.0124        | -0.0373        | 0         | 0.0115         | -0.0365        | 0         | 0.0336         | 0.0102    | 0.0373         | -0.0081    | -0.0125     |
| <i>GY</i>   | <b>-0.8111</b> | 1              | -0.0090  | 0.0086         | 0.0373         | 0         | -0.0119        | 0.0338         | 0         | -0.0369        | -0.0069   | -0.0420        | 0.0069     | 0.0154      |
| <i>Y</i>    | 0.2371         | <b>-0.1994</b> | 1        | 12.2686        | 0.0398         | 0         | -0.0149        | 0.0045         | 0         | -0.0064        | -74.2372  | -0.0397        | -0.3763    | 0.0140      |
| <i>L</i>    | -0.0003        | 0.0003         | 0.0032   | 1              | -0.0291        | 0         | -0.0058        | 0.0031         | 0         | -0.0025        | -458.0833 | 0.0284         | -0.3409    | 0.0062      |
| <i>GL</i>   | -0.0915        | 0.1094         | 0.0010   | -0.0005        | 1              | 0         | -0.3417        | 0.0147         | 0         | -0.0142        | 0.0090    | -0.6169        | -0.0015    | 0.3356      |
| <i>TL</i>   | -              | -              | -        | -              | -              | 1         | 0              | 0              | 0         | 0              | 0         | 0              | 0          | 0           |
| <i>GTL</i>  | 0.0275         | -0.0342        | -0.0004  | -0.0001        | <b>-0.5319</b> | -         | 1              | -0.0385        | 0         | 0.0378         | -0.0097   | 0.3364         | 0.0023     | -0.6483     |
| <i>GT</i>   | <b>-0.2562</b> | 0.2843         | 0.0003   | 0.0002         | 1.1782         | -         | -0.1716        | 1              | 0         | -0.0710        | -0.0042   | -0.0143        | 0.0001     | 0.0373      |
| <i>TY</i>   | -              | -              | -        | -              | -              | -         | -              | -              | 1         | 0              | 0         | 0              | 0          | 0           |
| <i>GTY</i>  | 0.2345         | <b>-0.3084</b> | -0.0004  | -0.0001        | -0.0644        | -         | 0.1676         | <b>-0.9205</b> | -         | 1              | 0.0044    | 0.0170         | -0.0002    | -0.0433     |
| <i>YL</i>   | 0.0006         | -0.0005        | -0.0471  | <b>-0.2043</b> | 0.0004         | -         | -3.9E-04       | -0.0005        | -         | 0.0005         | 1         | -0.0095        | -3.1882    | 0.0095      |
| <i>GYL</i>  | 0.0900         | -0.1214        | -0.0010  | 0.0005         | <b>-0.9657</b> | -         | 0.5157         | -0.0641        | -         | 0.0758         | -0.0004   | 1              | 0.0013     | -0.3594     |
| <i>TYL</i>  | -0.0075        | 0.0076         | -0.0035  | -0.0022        | -0.0009        | -         | 0.0013         | 0.0002         | -         | -0.0003        | -0.0496   | 0.0008         | 1          | -0.0021     |
| <i>GTYL</i> | -0.0294        | 0.0436         | 0.0003   | 0.0001         | 0.5128         | -         | <b>-0.9701</b> | 0.1633         | -         | <b>-0.1884</b> | 0.0004    | <b>-0.5409</b> | -0.0012    | 1           |



Table S6: Asymptotic correlation (lower diagonal) and covariance (upper diagonal) matrix for TS<sub>2</sub>-VS<sub>2</sub>:GCA1-2013 German and Polish (GER&PL) dataset. TS<sub>2</sub>: GCA1-2009 + GCA2-2010 + GCA1-2010 + GCA2-2011, VS<sub>2</sub>: GCA1-2013. The factors are genotypes (*G*), testers (*T*), years (*Y*) and locations (*L*).

|             | <i>Y</i>       | <i>G</i>       | <i>GY</i> | <i>L</i>       | <i>GL</i>      | <i>TL</i> | <i>GTL</i>     | <i>GT</i>      | <i>TY</i> | <i>GTY</i> | <i>YL</i> | <i>GYL</i> | <i>TYL</i> | <i>GTYL</i> |
|-------------|----------------|----------------|-----------|----------------|----------------|-----------|----------------|----------------|-----------|------------|-----------|------------|------------|-------------|
| <i>G</i>    | 1              | -0.1341        | 0.0084    | -0.0123        | -0.0243        | 0         | 0.0106         | -0.0475        | 0         | 0.0425     | 0.0110    | 0.0240     | -0.0060    | -0.0106     |
| <i>GY</i>   | <b>-0.8469</b> | 1              | -0.0080   | 0.0097         | 0.0245         | 0         | -0.0107        | 0.0429         | 0         | -0.0460    | -0.0093   | -0.0281    | 0.0052     | 0.0137      |
| <i>Y</i>    | 0.1754         | -0.1511        | 1         | 3.5213         | 0.0199         | 0         | -0.0064        | 0.0044         | 0         | -0.0078    | -120.6435 | -0.0203    | -0.3188    | 0.0063      |
| <i>L</i>    | -0.0005        | 0.0004         | 0.0011    | 1              | -0.0195        | 0         | -0.0107        | 0.0045         | 0         | -0.0036    | -837.9200 | 0.0187     | 0.0361     | 0.0112      |
| <i>GL</i>   | -0.0913        | 0.1020         | 0.0006    | -0.0005        | 1              | 0         | -0.2598        | 0.0117         | 0         | -0.0115    | 0.0059    | -0.3946    | -0.0008    | 0.2552      |
| <i>TL</i>   | -              | -              | -         | -              | -              | 1         | 0              | 0              | 0         | 0          | 0         | 0          | 0          | 0           |
| <i>GTL</i>  | 0.0345         | -0.0388        | -0.0002   | -0.0002        | -0.5584        | -         | 1              | -0.0325        | 0         | 0.0320     | -0.0063   | 0.2563     | 0.0018     | -0.5317     |
| <i>GT</i>   | <b>-0.3540</b> | 0.3555         | 0.0003    | 0.0002         | 0.9334         | -         | -0.1385        | 1              | 0         | -0.0933    | -0.0064   | -0.0117    | 0.0004     | 0.0316      |
| <i>TY</i>   | -              | -              | -         | -              | -              | -         | -              | -              | 1         | 0          | 0         | 0          | 0          | 0           |
| <i>GTY</i>  | 0.3204         | <b>-0.3847</b> | -0.0005   | -0.0002        | -0.0570        | -         | 0.1378         | <b>-0.9229</b> | -         | 1          | 0.0064    | 0.0137     | -0.0004    | -0.0367     |
| <i>YL</i>   | 0.0006         | -0.0006        | -0.0572   | <b>-0.3189</b> | 0.0002         | -         | -2.0E-04       | -0.0005        | -         | 0.0005     | 1         | -0.0063    | -4.4431    | 0.0063      |
| <i>GYL</i>  | 0.0878         | -0.1147        | -0.0006   | 0.0005         | <b>-0.9563</b> | -         | 0.5378         | -0.0564        | -         | 0.0666     | -0.0002   | 1          | 0.0007     | -0.2779     |
| <i>TYL</i>  | -0.0058        | 0.0057         | -0.0026   | 0.0002         | -0.0005        | -         | 0.0010         | 0.0004         | -         | -0.0005    | -0.0430   | 0.0004     | 1          | -0.0016     |
| <i>GTYL</i> | -0.0337        | 0.0484         | 0.0002    | 0.0002         | 0.5361         | -         | <b>-0.9671</b> | 0.1319         | -         | -0.1547    | 0.0002    | -0.5700    | -0.0009    | 1           |

Table S7: Asymptotic correlation (lower diagonal) and covariance (upper diagonal) matrix for TS<sub>2</sub>-VS<sub>1</sub>:GCA1-2012 German and Polish (GER&PL) dataset. TS<sub>2</sub>: GCA1-2009 + GCA2-2010 + GCA1-2010 + GCA2-2011, VS<sub>1</sub>: GCA1-2012. The factors are genotypes (*G*), testers (*T*), years (*Y*) and locations (*L*).

|             | <i>G</i>       | <i>GY</i>      | <i>Y</i> | <i>L</i> | <i>GL</i>      | <i>TL</i> | <i>GTL</i>     | <i>GT</i>      | <i>TY</i> | <i>GTY</i> | <i>YL</i> | <i>GYL</i>     | <i>TYL</i> | <i>GTYL</i> |
|-------------|----------------|----------------|----------|----------|----------------|-----------|----------------|----------------|-----------|------------|-----------|----------------|------------|-------------|
| <i>G</i>    | 1              | -0.1526        | 0.2375   | 0.0016   | -0.0222        | 0         | 0.0086         | -0.0326        | 0         | 0.0294     | 0.0011    | 0.0210         | -0.0067    | -0.0083     |
| <i>GY</i>   | <b>-0.7924</b> | 1              | -0.1947  | 0.0024   | 0.0222         | 0         | -0.0089        | 0.0296         | 0         | -0.0330    | -0.0013   | -0.0258        | 0.0053     | 0.0116      |
| <i>Y</i>    | 0.0089         | -0.0087        | 1        | 0.7995   | 0.0208         | 0         | -0.0048        | 0.0057         | 0         | -0.0084    | -46.5272  | -0.0219        | -0.3627    | 0.0045      |
| <i>L</i>    | 0.0001         | 0.0001         | 0.0003   | 1        | -0.0164        | 0         | -0.0050        | 0.0007         | 0         | -0.0003    | -243.4461 | 0.0143         | -0.2184    | 0.0051      |
| <i>GL</i>   | -0.0764        | 0.0908         | 0.0006   | -0.0005  | 1              | 0         | -0.2234        | 0.0107         | 0         | -0.0103    | 0.0042    | -0.3623        | -0.0006    | 0.2200      |
| <i>TL</i>   | -              | -              | -        | -        | -              | 1         | 0              | 0              | 0         | 0          | 0         | 0              | 0          | 0           |
| <i>GTL</i>  | 0.0259         | -0.0319        | -0.0001  | -0.0001  | <b>-0.5329</b> | -         | 1              | -0.0288        | 0         | 0.0282     | -0.0069   | 0.2200         | 0.0016     | -0.4705     |
| <i>GT</i>   | -0.2527        | 0.2739         | 0.0004   | 0.0000   | 0.0652         | -         | -0.1548        | 1              | 0         | -0.0667    | -0.0021   | -0.0099        | 0.0002     | 0.0276      |
| <i>TY</i>   | -              | -              | -        | -        | -              | -         | -              | -              | 1         | 0          | 0         | 0              | 0          | 0           |
| <i>GTY</i>  | 0.2259         | <b>-0.3026</b> | -0.0006  | 0.0000   | -0.0624        | -         | 0.1507         | <b>-0.9122</b> | -         | 1          | 0.0020    | 0.0124         | -0.0001    | -0.0329     |
| <i>YL</i>   | 0.0001         | -0.0001        | -0.0343  | -0.1802  | 0.0003         | -         | -0.0004        | -0.0003        | -         | 0.0003     | 1         | -0.0043        | -3.3215    | 0.0071      |
| <i>GYL</i>  | 0.0703         | -0.1033        | -0.0006  | 0.0004   | <b>-0.9589</b> | -         | 0.5123         | -0.0593        | -         | 0.0737     | -0.0003   | 1              | 0.0005     | -0.2364     |
| <i>TYL</i>  | -0.0063        | 0.0060         | -0.0029  | -0.0018  | -0.0004        | -         | 0.0011         | 0.0003         | -         | -0.0002    | -0.0615   | 0.0004         | 1          | -0.0015     |
| <i>GTYL</i> | -0.0247        | 0.0409         | 0.0001   | 0.0001   | 0.5149         | -         | <b>-0.9685</b> | 0.1455         | -         | -0.1719    | 0.0004    | <b>-0.5399</b> | -0.0009    | 1           |

Table S8: Asymptotic correlation (lower diagonal) and covariance (upper diagonal) matrix for TS<sub>3</sub>-VS<sub>3</sub>:GCA1-2014 German and Polish (GER&PL) dataset. TS<sub>3</sub>: GCA1-2009 + GCA2-2010 + GCA3-2011 + GCA1-2010 + GCA2-2011 + GCA3-2012 + GCA1-2011 + GCA2-2012 + GCA3-2013, VS<sub>3</sub>: GCA1-2014. The factors are genotypes (*G*), testers (*T*), years (*Y*) and locations (*L*).

|             | <i>G</i>       | <i>GY</i>      | <i>Y</i> | <i>L</i> | <i>GL</i>      | <i>TL</i>      | <i>GTL</i>     | <i>GT</i>      | <i>TY</i> | <i>GTY</i> | <i>YL</i> | <i>GYL</i> | <i>TYL</i> | <i>GTYL</i> |
|-------------|----------------|----------------|----------|----------|----------------|----------------|----------------|----------------|-----------|------------|-----------|------------|------------|-------------|
| <i>G</i>    | 1              | -0.0427        | -0.0394  | -0.0046  | -0.0045        | 0.0017         | -0.0004        | -0.0108        | 0         | 0.0091     | 0.0021    | 0.0039     | -0.0011    | 0.0001      |
| <i>GY</i>   | <b>-0.6425</b> | 1              | 0.0300   | 0.0028   | 0.0038         | -0.0009        | -0.0001        | 0.0089         | 0         | -0.0108    | -0.0012   | -0.0058    | 0.0006     | 0.0015      |
| <i>Y</i>    | -0.0027        | 0.0030         | 1        | -11.3578 | 0.0015         | -3.6709        | 0.0090         | -0.0039        | 0         | 0.0029     | -13.0843  | -0.0009    | 2.9638     | -0.0091     |
| <i>L</i>    | -0.0003        | 0.0002         | -0.0042  | 1        | -0.0005        | -2.4570        | -0.0026        | 0.0003         | 0         | 0.0000     | -95.7799  | 0.0015     | 1.7234     | 0.0019      |
| <i>GL</i>   | -0.0544        | 0.0687         | 0.0001   | 0.0000   | 1              | 0.0005         | -0.0342        | 0.0018         | 0         | -0.0019    | 0.0042    | -0.0649    | -0.0004    | 0.0333      |
| <i>TL</i>   | 0.0010         | -0.0008        | -0.0150  | -0.0082  | 0.0003         | 1              | 0.0006         | -0.0010        | 0         | 0.0000     | 1.3346    | 0.0015     | -22.8760   | -0.0018     |
| <i>GTL</i>  | -0.0028        | -0.0013        | 0.0004   | -0.0001  | <b>-0.2839</b> | 0.0003         | 1              | -0.0130        | 0         | 0.0129     | -0.0020   | 0.0329     | 0.0001     | -0.2099     |
| <i>GT</i>   | -0.1873        | 0.2286         | -0.0005  | 0.0000   | 0.0371         | -0.0010        | -0.1531        | 1              | 0         | -0.0297    | -0.0007   | -0.0018    | 0.0009     | 0.0126      |
| <i>TY</i>   | -              | -              | -        | -        | -              | -              | -              | -              | 1         | 0          | 0         | 0          | 0          | 0           |
| <i>GTY</i>  | 0.1601         | <b>-0.2815</b> | 0.0003   | 0.0000   | -0.0398        | 0.0000         | 0.1538         | <b>-0.8880</b> | -         | 1          | 0.0007    | 0.0029     | 0.0004     | -0.0152     |
| <i>YL</i>   | 0.0004         | -0.0003        | -0.0165  | -0.0981  | 0.0009         | 0.0150         | -0.0003        | -0.0002        | -         | 0.0002     | 1         | -0.0044    | -4.4463    | 0.0020      |
| <i>GYL</i>  | 0.0430         | -0.0940        | -0.0001  | 0.0001   | <b>-0.8576</b> | 0.0010         | 0.2468         | -0.0333        | -         | 0.0553     | -0.0009   | 1          | -0.0016    | -0.0445     |
| <i>TYL</i>  | -0.0007        | 0.0006         | 0.0127   | 0.0060   | -0.0003        | <b>-0.8751</b> | 0.0000         | 0.0010         | -         | 0.0004     | -0.0525   | -0.0011    | 1          | 0.0007      |
| <i>GTYL</i> | 0.0006         | 0.0149         | -0.0004  | 0.0001   | 0.2688         | -0.0007        | <b>-0.9604</b> | 0.1435         | -         | -0.1768    | 0.0003    | -0.3239    | 0.0003     | 1           |

Table S9: Asymptotic correlation (lower diagonal) and covariance (upper diagonal) matrix for TS<sub>3</sub>-VS<sub>2</sub>:GCA1-2013 German and Polish (GER&PL) dataset. TS<sub>3</sub>: GCA1-2009 + GCA2-2010 + GCA3-2011 + GCA1-2010 + GCA2-2011 + GCA3-2012 + GCA1-2011 + GCA2-2012 + GCA3-2013, VS<sub>2</sub>: GCA1-2013. The factors are genotypes (*G*), testers (*T*), years (*Y*) and locations (*L*).

|             | <i>G</i>       | <i>GY</i>      | <i>Y</i> | <i>L</i> | <i>GL</i>      | <i>TL</i>      | <i>GTL</i>     | <i>GT</i>      | <i>TY</i> | <i>GTY</i> | <i>YL</i> | <i>GYL</i>     | <i>TYL</i> | <i>GTYL</i> |
|-------------|----------------|----------------|----------|----------|----------------|----------------|----------------|----------------|-----------|------------|-----------|----------------|------------|-------------|
| <i>G</i>    | 1              | -0.0489        | -0.0526  | 0.0053   | -0.0033        | 0.0038         | -0.0001        | -0.0116        | 0         | 0.0093     | 0.0018    | 0.0027         | -0.0001    | 0.0001      |
| <i>GY</i>   | <b>-0.6967</b> | 1              | 0.0438   | -0.0054  | 0.0028         | -0.0028        | -0.0003        | 0.0087         | 0         | -0.0110    | -0.0020   | -0.0047        | -0.0003    | 0.0016      |
| <i>Y</i>    | -0.0037        | 0.0040         | 1        | -10.9361 | 0.0002         | -4.7179        | 0.0079         | -0.0066        | 0         | 0.0051     | -17.3793  | -0.0001        | 3.8107     | -0.0080     |
| <i>L</i>    | 0.0003         | -0.0004        | -0.0042  | 1        | -0.0001        | -3.3662        | -0.0035        | -0.0011        | 0         | 0.0012     | -131.2160 | 0.0006         | 2.6769     | 0.0034      |
| <i>GL</i>   | -0.0506        | 0.0550         | 0.0000   | 0.0000   | 1              | 0.0016         | -0.0254        | 0.0013         | 0         | -0.0015    | 0.0011    | -0.0434        | -0.0024    | 0.0248      |
| <i>TL</i>   | 0.0023         | -0.0021        | -0.0176  | -0.0110  | 0.0013         | 1              | -0.0001        | -0.0019        | 0         | 0.0005     | 2.5194    | 0.0002         | -25.7527   | -0.0008     |
| <i>GTL</i>  | -0.0010        | -0.0031        | 0.0004   | -0.0001  | <b>-0.2712</b> | 0.0000         | 1              | -0.0118        | 0         | 0.0116     | -0.0002   | 0.0246         | 0.0012     | -0.1867     |
| <i>GT</i>   | <b>-0.1988</b> | 0.1937         | -0.0007  | -0.0001  | 0.0316         | -0.0017        | -0.1408        | 1              | 0         | -0.0311    | -0.0016   | -0.0014        | 0.0012     | 0.0113      |
| <i>TY</i>   | -              | -              | -        | -        | -              | -              | -              | -              | 1         | 0          | 0         | 0              | 0          | 0           |
| <i>GTY</i>  | 0.1659         | <b>-0.2552</b> | 0.0006   | 0.0001   | -0.0366        | 0.0005         | 0.1447         | <b>-0.8708</b> | -         | 1          | 0.0016    | 0.0025         | 0.0003     | -0.0140     |
| <i>YL</i>   | 0.0003         | -0.0004        | -0.0187  | -0.1234  | 0.0003         | 0.0230         | 0.0000         | -0.0004        | -         | 0.0004     | 1         | 0.0040         | -5.4092    | -0.0036     |
| <i>GYL</i>  | 0.0365         | -0.0819        | 0.0000   | 0.0000   | <b>-0.8136</b> | 0.0002         | 0.2281         | -0.0290        | -         | 0.0536     | 0.0008    | 1              | -0.0001    | -0.0359     |
| <i>TYL</i>  | -0.0001        | -0.0002        | 0.0152   | 0.0094   | -0.0021        | <b>-0.8720</b> | 0.0005         | 0.0012         | -         | 0.0004     | -0.0528   | -0.0001        | 1          | -0.0001     |
| <i>GTYL</i> | 0.0011         | 0.0155         | -0.0004  | 0.0001   | 0.2561         | -0.0003        | <b>-0.9560</b> | 0.1306         | -         | -0.1677    | -0.0004   | <b>-0.3222</b> | 0.0000     | 1           |

Table S10: Asymptotic correlation (lower diagonal) and covariance (upper diagonal) matrix for  $TS_3$ - $VS_1$ :GCA1-2012 German and Polish (GER&PL) dataset.  $TS_3$ : GCA1-2009 + GCA2-2010 + GCA3-2011 + GCA1-2010 + GCA2-2011 + GCA3-2012 + GCA1-2011 + GCA2-2012 + GCA3-2013,  $VS_1$ : GCA1-2012. The factors are genotypes ( $G$ ), testers ( $T$ ), years ( $Y$ ) and locations ( $L$ ).

|        | $G$            | $GY$    | $Y$     | $L$     | $GL$           | $TL$           | $GTL$          | $GT$           | $TY$           | $GTY$   | $YL$      | $GYL$          | $TYL$    | $GTYL$  |
|--------|----------------|---------|---------|---------|----------------|----------------|----------------|----------------|----------------|---------|-----------|----------------|----------|---------|
| $G$    | 1              | -0.2622 | -0.4926 | 0.0179  | -0.0056        | -0.0058        | -0.0007        | -0.0140        | 0.0002         | 0.0122  | -0.0096   | 0.0052         | 0.0050   | 0.0005  |
| $GY$   | <b>-0.8915</b> | 1       | 0.4666  | -0.0146 | 0.0049         | 0.0054         | 0.0007         | 0.0118         | -0.0007        | -0.0148 | 0.0088    | -0.0082        | -0.0050  | 0.0012  |
| $Y$    | -0.0158        | 0.0153  | 1       | -8.4482 | -0.0009        | -7.1051        | 0.0157         | -0.0194        | -2.3148        | 0.0149  | -15.8806  | -0.0016        | 6.4270   | -0.0130 |
| $L$    | 0.0006         | -0.0005 | -0.0027 | 1       | -0.0126        | -2.8175        | 0.0006         | 0.0003         | -0.2087        | 0.0002  | -118.7310 | 0.0130         | 2.1704   | -0.0017 |
| $GL$   | -0.0351        | 0.0310  | -0.0001 | -0.0008 | 1              | -0.0009        | -0.0455        | 0.0023         | -0.0009        | -0.0025 | 0.0114    | -0.0821        | -0.0012  | 0.0445  |
| $TL$   | -0.0022        | 0.0020  | -0.0255 | -0.0106 | -0.0006        | 1              | -0.0006        | -0.0001        | 1.8393         | 0.0005  | 1.8097    | 0.0032         | -19.5968 | -0.0018 |
| $GTL$  | -0.0027        | 0.0028  | 0.0006  | 0.0000  | -0.3169        | -0.0002        | 1              | -0.0160        | -0.0007        | 0.0159  | -0.0048   | 0.0437         | 0.0027   | -0.2373 |
| $GT$   | -0.1163        | 0.1001  | -0.0016 | 0.0000  | 0.0365         | -0.0001        | -0.1481        | 1              | -0.0017        | -0.0431 | -0.0015   | -0.0021        | 0.0001   | 0.0151  |
| $TY$   | 0.0003         | -0.0009 | -0.0275 | -0.1586 | -0.0020        | 0.2532         | -0.0010        | -0.0051        | 1              | 0.0029  | 0.1432    | 0.0006         | -2.0138  | 0.0002  |
| $GTY$  | 0.1014         | -0.1257 | 0.0012  | 0.0000  | -0.0392        | 0.0004         | 0.1472         | <b>-0.8951</b> | 0.0088         | 1       | 0.0011    | 0.0038         | 0.0000   | -0.0190 |
| $YL$   | -0.0010        | 0.0009  | -0.0153 | -0.1190 | 0.0021         | 0.0201         | -0.0005        | -0.0004        | 0.0053         | 0.0003  | 1         | -0.0106        | -4.2475  | 0.0045  |
| $GYL$  | 0.0296         | -0.0473 | -0.0001 | 0.0007  | <b>-0.8693</b> | 0.0020         | 0.2753         | -0.0293        | 0.0012         | 0.0542  | -0.0018   | 1              | -0.0020  | -0.0568 |
| $TYL$  | 0.0020         | -0.0020 | 0.0244  | 0.0086  | -0.0009        | <b>-0.8614</b> | 0.0012         | 0.0001         | <b>-0.2934</b> | 0.0000  | -0.0500   | -0.0013        | 1        | -0.0006 |
| $GTYL$ | 0.0019         | 0.0043  | -0.0005 | -0.0001 | 0.3016         | -0.0007        | <b>-0.9553</b> | 0.1362         | 0.0003         | -0.1720 | 0.0005    | <b>-0.3480</b> | -0.0002  | 1       |

## 5 Predictive abilities of sampling scenarios

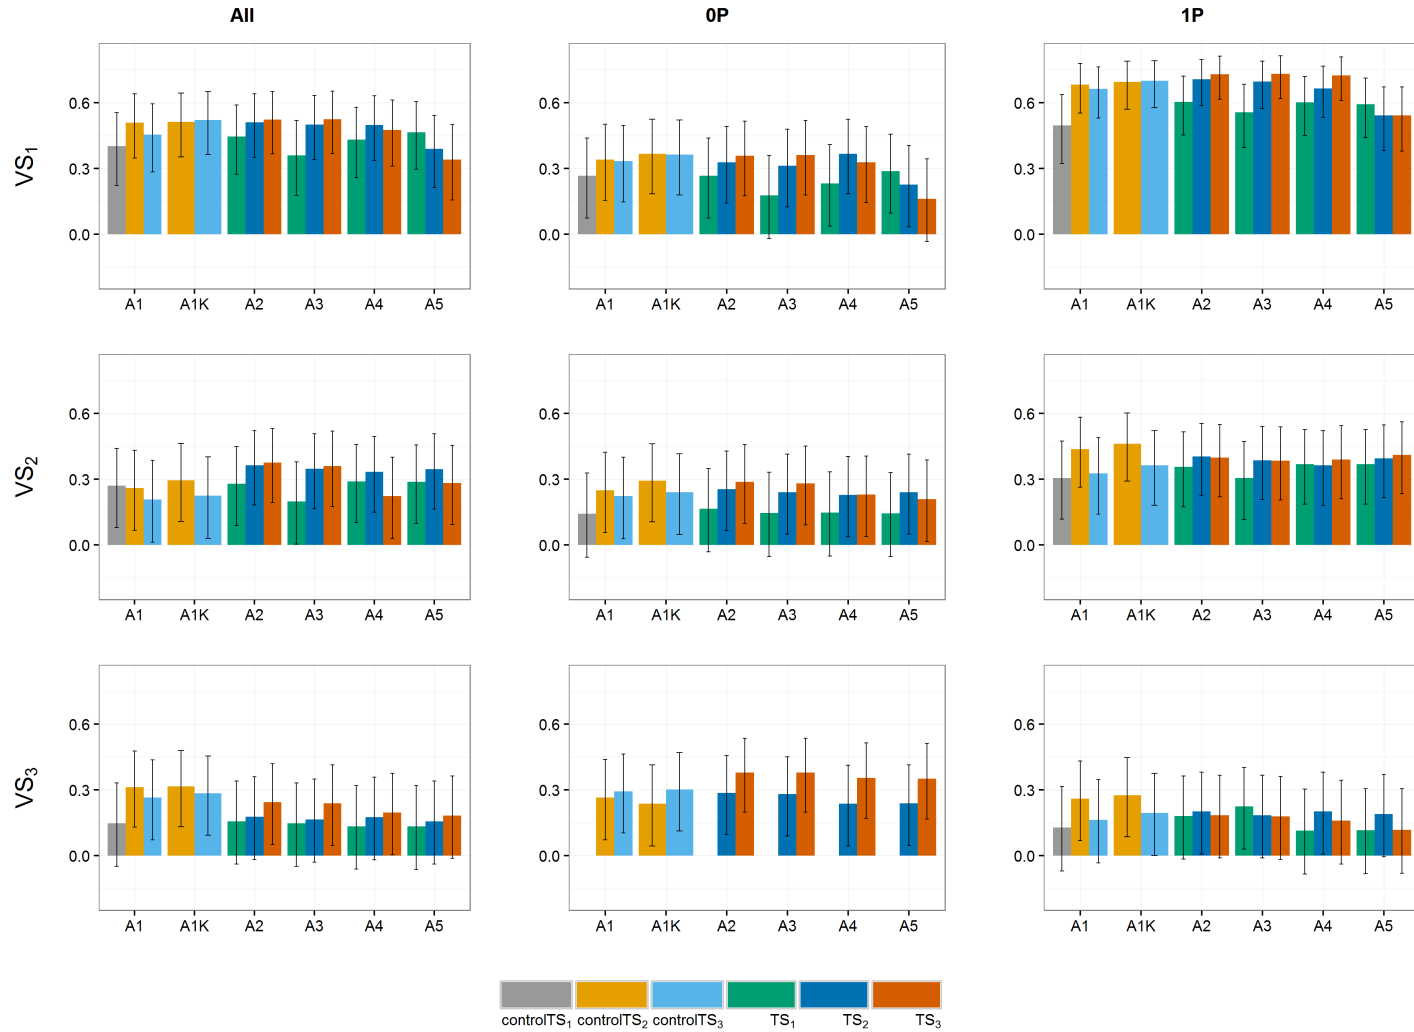

Figure S5: **Predictive abilities (y-axis) of the German dataset using VS-size of 100 genotypes for the three scenarios.** TS<sub>1</sub> and controlTS<sub>1</sub>, TS<sub>2</sub> and controlTS<sub>2</sub>, and TS<sub>3</sub> and controlTS<sub>3</sub> to predict the validation sets VS<sub>1</sub>, VS<sub>2</sub> and VS<sub>3</sub> with All-, 0P- and 1P-scenarios. Black lines for each bar represent the 95% confidence intervals of the mean predictive ability. Year-wise approach (A1) and year-wise with kinship approach (A1K) were fitted to the control sets, approaches 2-stg-Kin (A2), 2-stg-Kin-het (A3), 3-stg-NoKin (A4) and 3-stg-Kin (A5) to the complete sets. TS<sub>1</sub>: GCA1-2009 + GCA2-2010 + GCA3-2011, controlTS<sub>1</sub>: GCA1-2009, TS<sub>2</sub>: GCA1-2009 + GCA2-2010 + GCA1-2010 + GCA2-2011, controlTS<sub>2</sub>: GCA1-2009 + GCA1-2010, TS<sub>3</sub>: GCA1-2009 + GCA2-2010 + GCA3-2011 + GCA1-2010 + GCA2-2011 + GCA3-2012 + GCA1-2011 + GCA2-2012 + GCA3-2013, controlTS<sub>3</sub>: GCA1-2009 + GCA1-2010 + GCA1-2011, VS<sub>1</sub>: GCA1-2012, VS<sub>2</sub>: GCA1-2013, VS<sub>3</sub>: GCA1-2014.

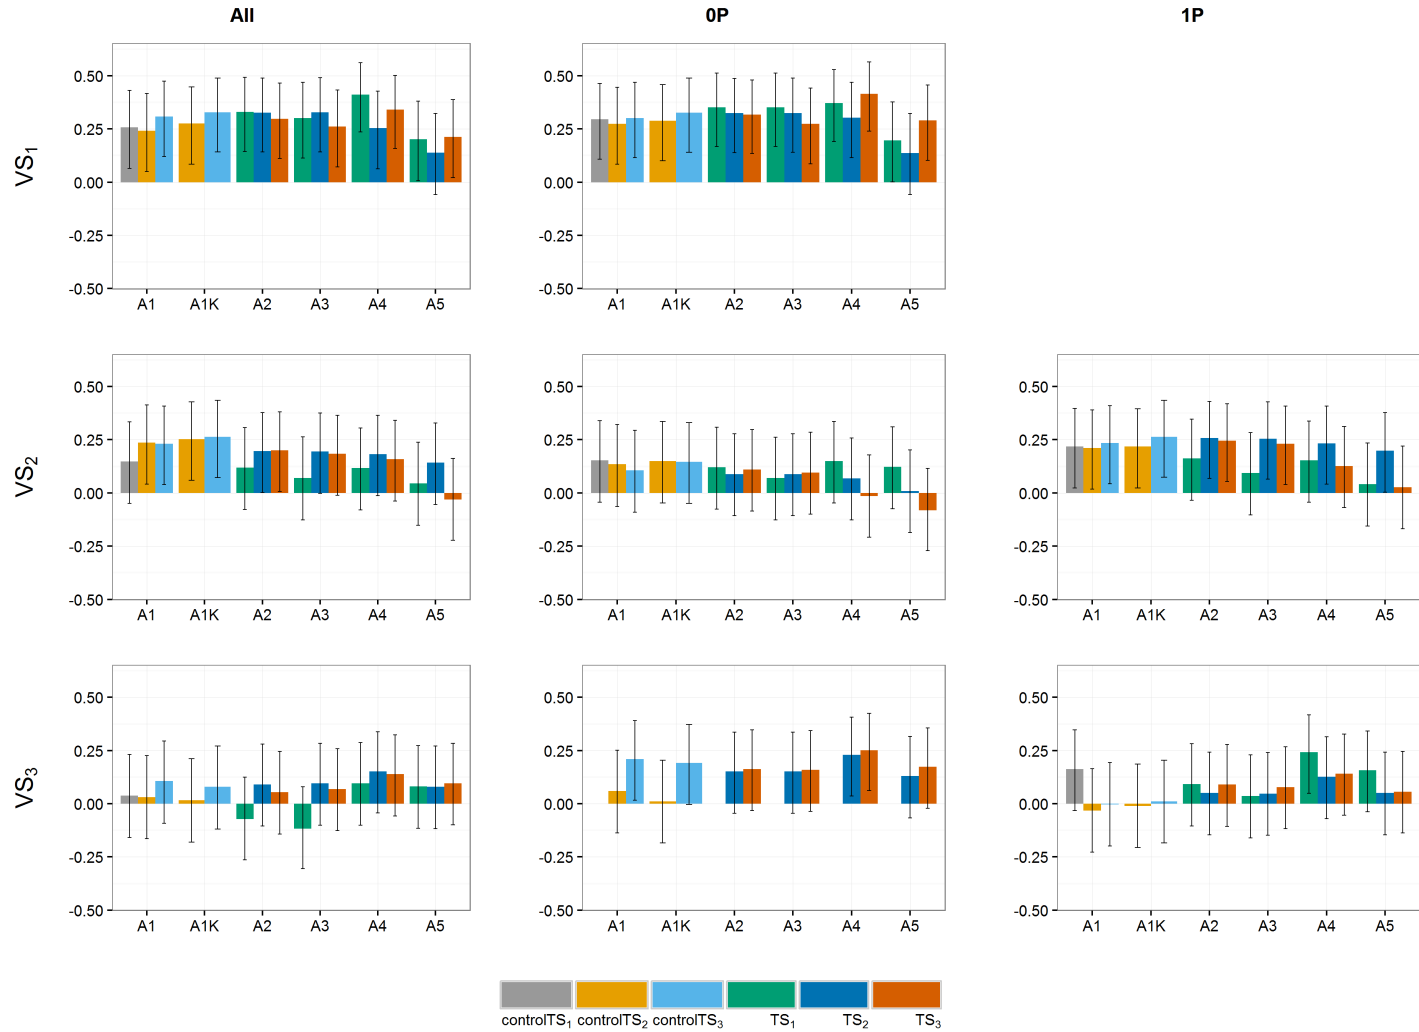

Figure S6: **Predictive abilities (y-axis) of the Polish dataset using VS-size of 100 genotypes for the three scenarios.** TS<sub>1</sub> and controlTS<sub>1</sub>, TS<sub>2</sub> and controlTS<sub>2</sub>, and TS<sub>3</sub> and controlTS<sub>3</sub> to predict the validation sets VS<sub>1</sub>, VS<sub>2</sub> and VS<sub>3</sub> with All-, 0P- and 1P-scenarios. Black lines for each bar represent the 95% confidence intervals of the mean predictive ability. Year-wise approach (A1) and year-wise with kinship approach (A1K) were fitted to the control sets, approaches 2-stg-Kin (A2), 2-stg-Kin-het (A3), 3-stg-NoKin (A4) and 3-stg-Kin (A5) to the complete sets. TS<sub>1</sub>: GCA1-2009 + GCA2-2010 + GCA3-2011, controlTS<sub>1</sub>: GCA1-2009, TS<sub>2</sub>: GCA1-2009 + GCA2-2010 + GCA1-2010 + GCA2-2011, controlTS<sub>2</sub>: GCA1-2009 + GCA1-2010, TS<sub>3</sub>: GCA1-2009 + GCA2-2010 + GCA3-2011 + GCA1-2010 + GCA2-2011 + GCA3-2012 + GCA1-2011 + GCA2-2012 + GCA3-2013, controlTS<sub>3</sub>: GCA1-2009 + GCA1-2010 + GCA1-2011, VS<sub>1</sub>: GCA1-2012, VS<sub>2</sub>: GCA1-2013, VS<sub>3</sub>: GCA1-2014.

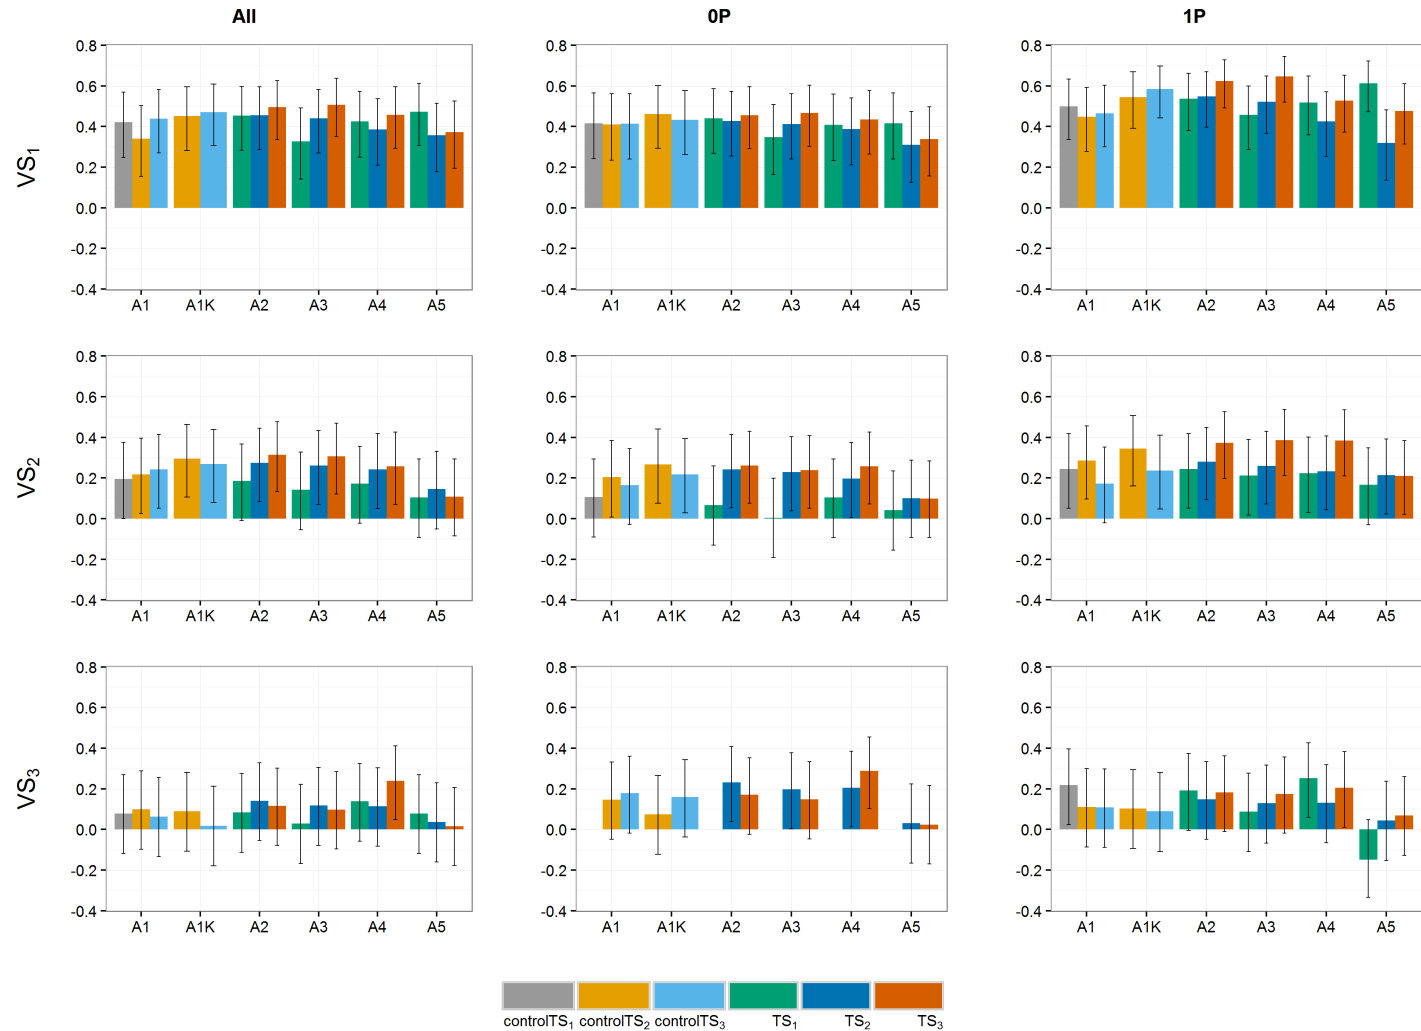

Figure S7: **Predictive abilities (y-axis) of the German and Polish dataset using VS-size of 100 genotypes for the three scenarios.** TS<sub>1</sub> and controlTS<sub>1</sub>, TS<sub>2</sub> and controlTS<sub>2</sub>, and TS<sub>3</sub> and controlTS<sub>3</sub> to predict the validation sets VS<sub>1</sub>, VS<sub>2</sub> and VS<sub>3</sub> with All-, 0P- and 1P-scenarios. Black lines for each bar represent the 95% confidence intervals of the mean predictive ability. Year-wise approach (A1) and year-wise with kinship approach (A1K) were fitted to the control sets, approaches 2-stg-Kin (A2), 2-stg-Kin-het (A3), 3-stg-NoKin (A4) and 3-stg-Kin (A5) to the complete sets. TS<sub>1</sub>: GCA1-2009 + GCA2-2010 + GCA3-2011, controlTS<sub>1</sub>: GCA1-2009, TS<sub>2</sub>: GCA1-2009 + GCA2-2010 + GCA1-2010 + GCA2-2011, controlTS<sub>2</sub>: GCA1-2009 + GCA1-2010, TS<sub>3</sub>: GCA1-2009 + GCA2-2010 + GCA3-2011 + GCA1-2010 + GCA2-2011 + GCA3-2012 + GCA1-2011 + GCA2-2012 + GCA3-2013, controlTS<sub>3</sub>: GCA1-2009 + GCA1-2010 + GCA1-2011, VS<sub>1</sub>: GCA1-2012, VS<sub>2</sub>: GCA1-2013, VS<sub>3</sub>: GCA1-2014.

## 6 PCA plots

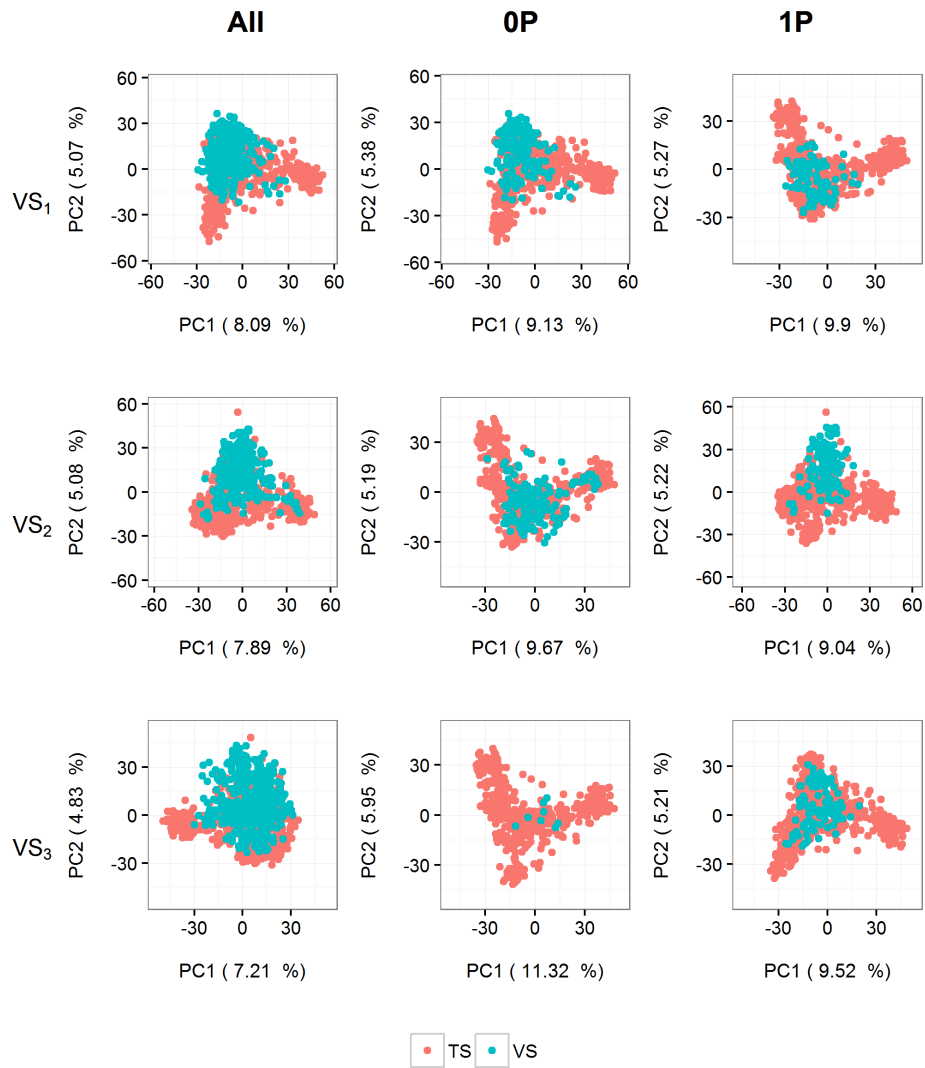

Figure S8: **Principal component (PC) plots for the German dataset between TS<sub>1</sub> and all VS.** TS<sub>1</sub> and relatedness scenarios (All-, 0P- and 1P-scenarios) for VS<sub>1</sub>, VS<sub>2</sub> and VS<sub>3</sub>. TS<sub>1</sub>:GCA1-2009 + GCA2-2010 + GCA3-2011, VS<sub>1</sub>:GCA1-2012, VS<sub>2</sub>:GCA1-2013, VS<sub>3</sub>:GCA1-2014.

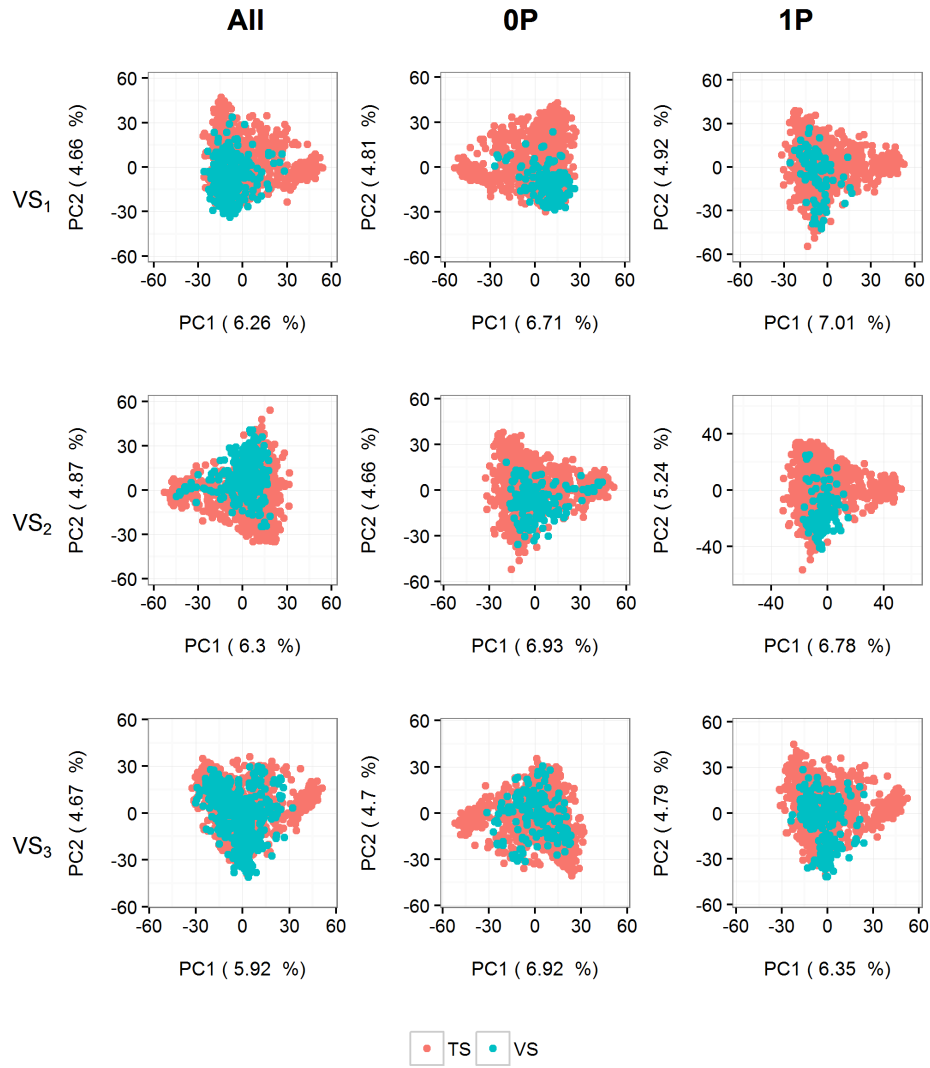

Figure S9: **Principal component (PC) plots for the German dataset between TS<sub>2</sub> and all VS.** TS<sub>2</sub> and relatedness scenarios (All-, 0P- and 1P-scenarios) for VS<sub>1</sub>, VS<sub>2</sub> and VS<sub>3</sub>. TS<sub>2</sub>:GCA1-2009 + GCA2-2010 + GCA1-2010 + GCA2-2011, VS<sub>1</sub>:GCA1-2012, VS<sub>2</sub>:GCA1-2013, VS<sub>3</sub>:GCA1-2014.



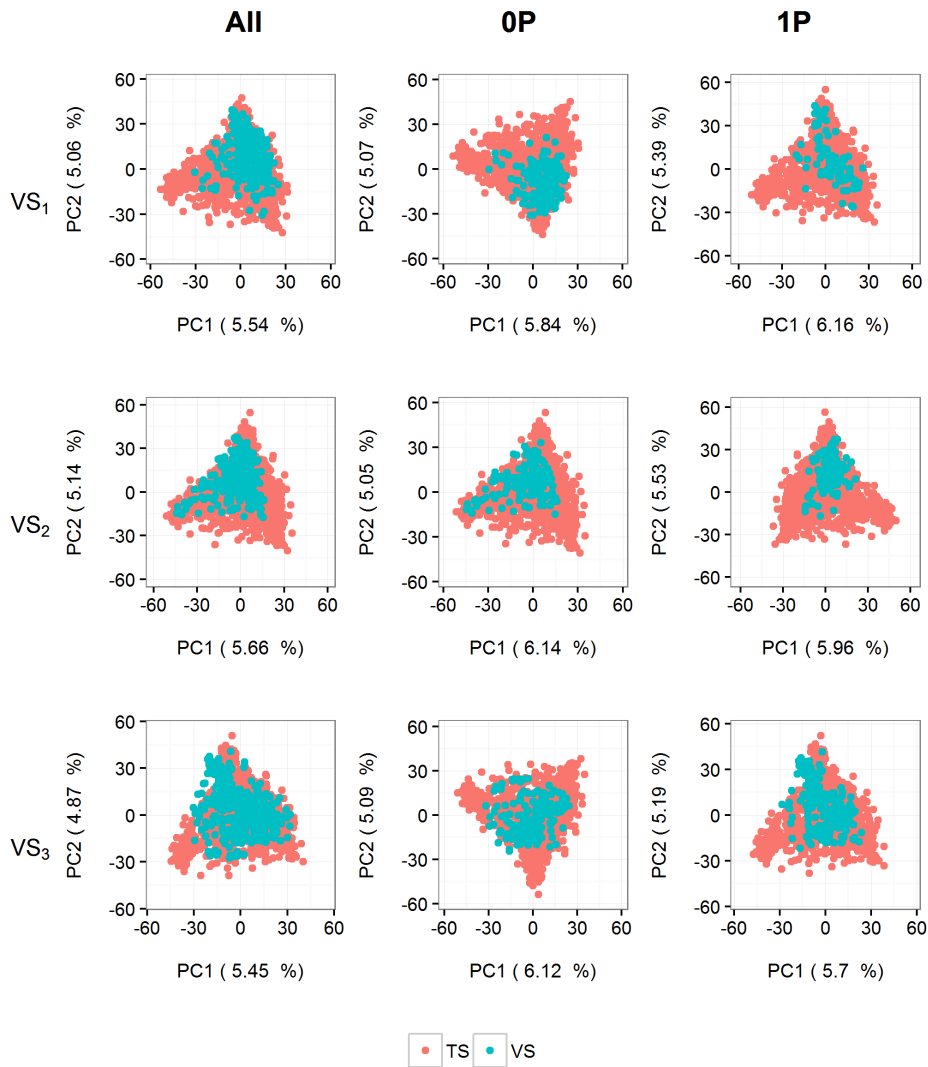

Figure S10: **Principal component (PC) plots for the German dataset between TS<sub>3</sub> and all VS.** TS<sub>3</sub> and relatedness scenarios (All-, 0P- and 1P-scenarios) for VS<sub>1</sub>, VS<sub>2</sub> and VS<sub>3</sub>. TS<sub>3</sub>:GCA1-2009 + GCA2-2010 + GCA3-2011 + GCA1-2010 + GCA2-2011 + GCA3-2012 + GCA1-2011 + GCA2-2012 + GCA3-2013, VS<sub>1</sub>:GCA1-2012, VS<sub>2</sub>:GCA1-2013, VS<sub>3</sub>:GCA1-2014.

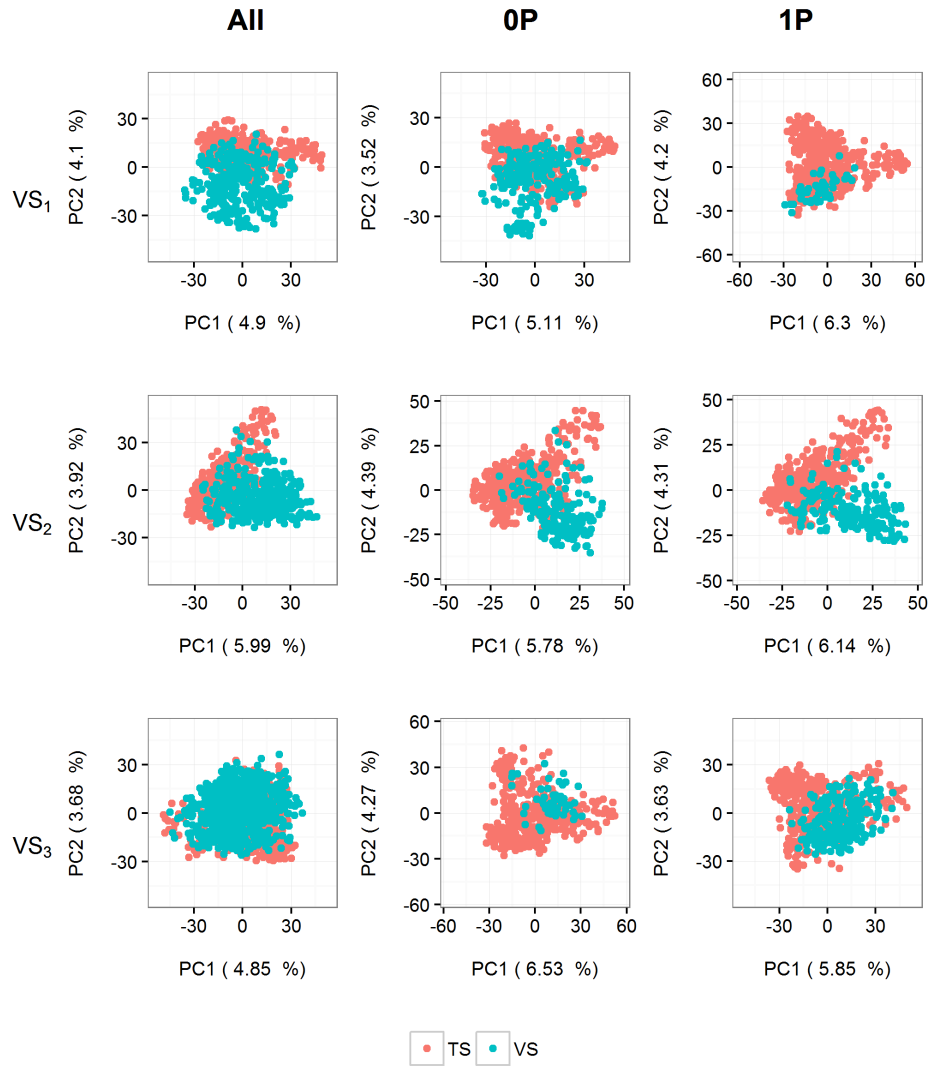

Figure S11: **Principal component (PC) plots for the Polish dataset between TS<sub>1</sub> and all VS.** TS<sub>1</sub> and relatedness scenarios (All-, 0P- and 1P-scenarios) for VS<sub>1</sub>, VS<sub>2</sub> and VS<sub>3</sub>. TS<sub>1</sub>:GCA1-2009 + GCA2-2010 + GCA3-2011, VS<sub>1</sub>:GCA1-2012, VS<sub>2</sub>:GCA1-2013, VS<sub>3</sub>:GCA1-2014.

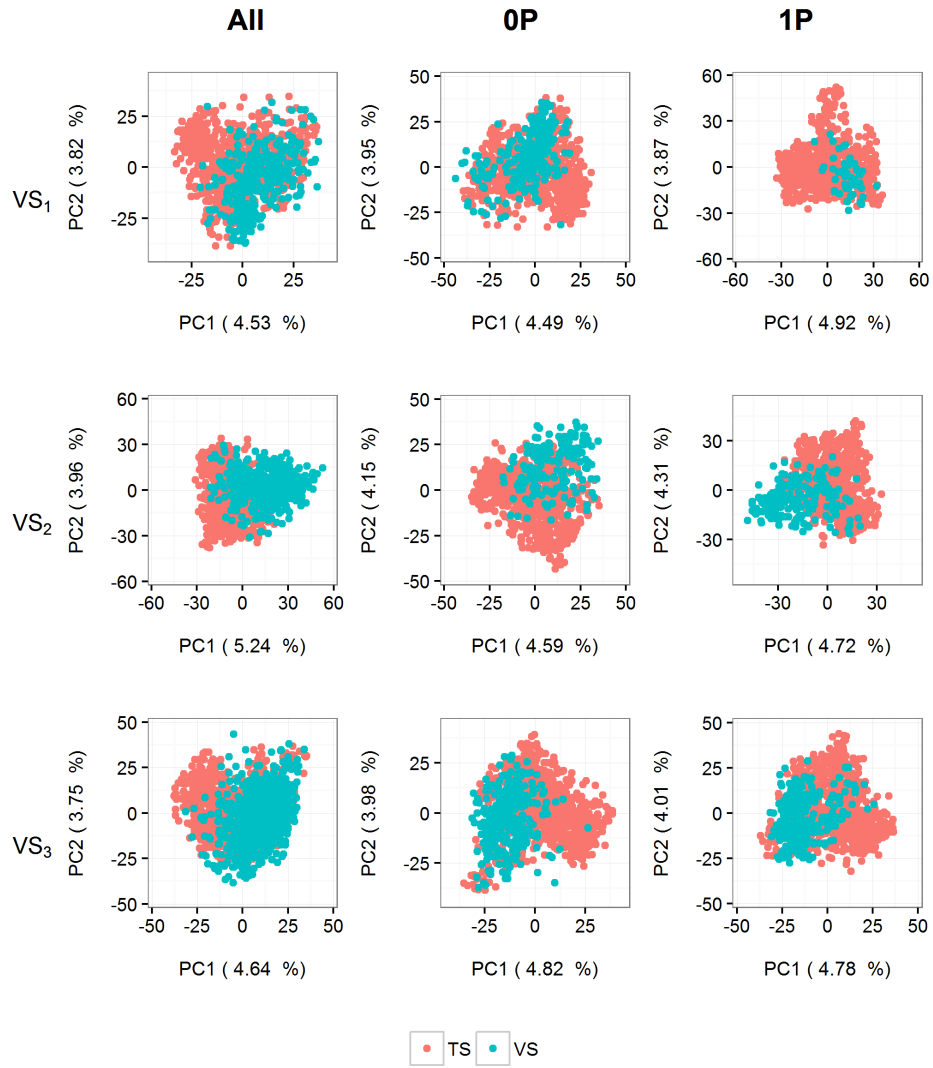

Figure S12: **Principal component (PC) plots for the Polish dataset between TS<sub>2</sub> and all VS.** TS<sub>2</sub> and relatedness scenarios (All-, 0P- and 1P-scenarios) for VS<sub>1</sub>, VS<sub>2</sub> and VS<sub>3</sub>. TS<sub>2</sub>:GCA1-2009 + GCA2-2010 + GCA1-2010 + GCA2-2011, VS<sub>1</sub>:GCA1-2012, VS<sub>2</sub>:GCA1-2013, VS<sub>3</sub>:GCA1-2014.

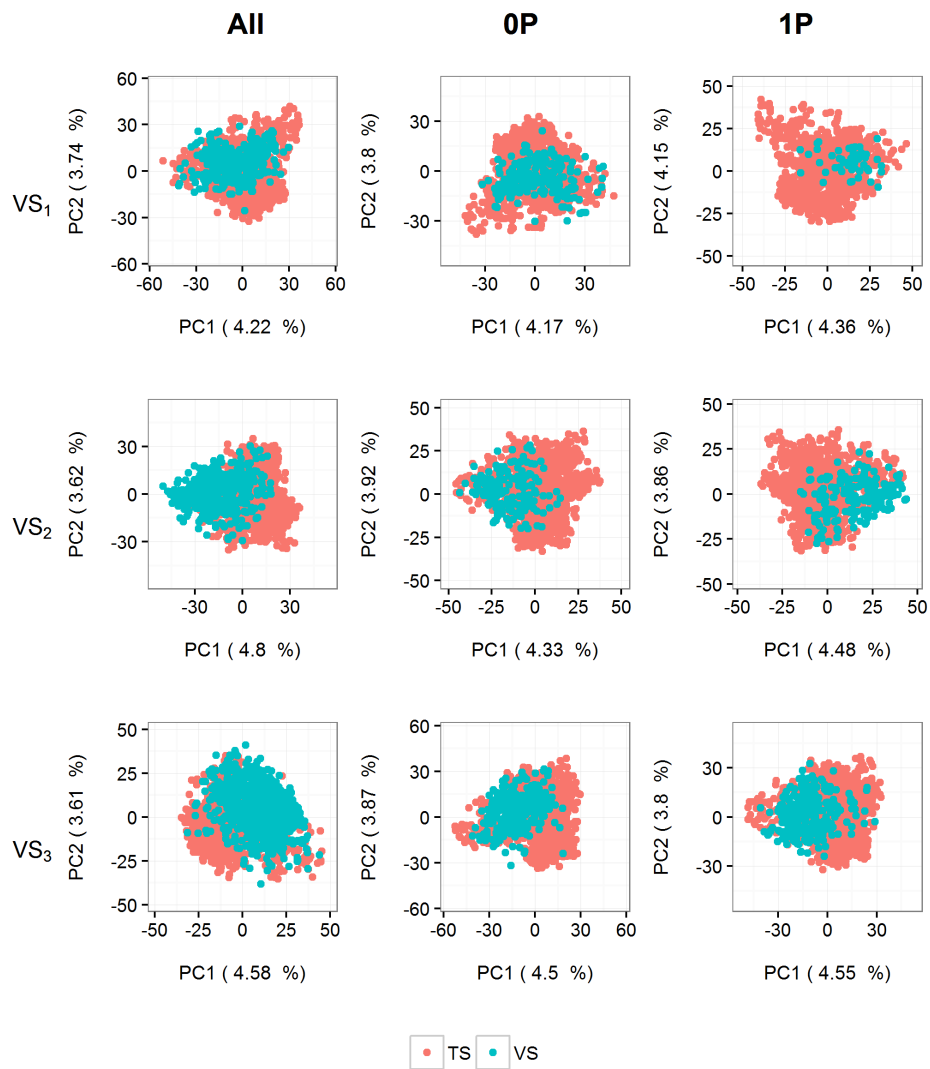

Figure S13: **Principal component (PC) plots for the Polish dataset between TS<sub>3</sub> and all VS.** TS<sub>3</sub> and relatedness scenarios (All-, 0P- and 1P-scenarios) for VS<sub>1</sub>, VS<sub>2</sub> and VS<sub>3</sub>. TS<sub>3</sub>:GCA1-2009 + GCA2-2010 + GCA3-2011 + GCA1-2010 + GCA2-2011 + GCA3-2012 + GCA1-2011 + GCA2-2012 + GCA3-2013, VS<sub>1</sub>:GCA1-2012, VS<sub>2</sub>:GCA1-2013, VS<sub>3</sub>:GCA1-2014.

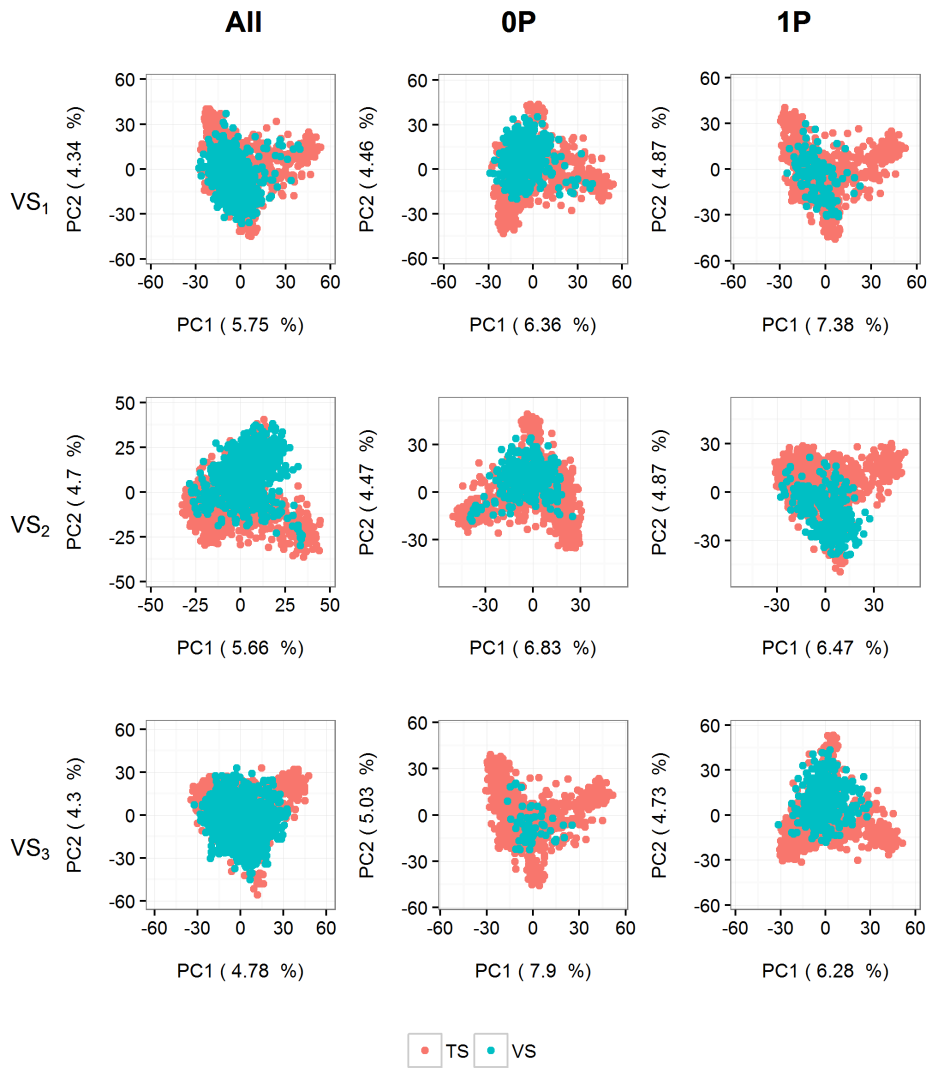

Figure S14: **Principal component (PC) plots for the German and Polish dataset between TS<sub>1</sub> and all VS.** TS<sub>1</sub> and relatedness scenarios (All-, 0P- and 1P-scenarios) for VS<sub>1</sub>, VS<sub>2</sub> and VS<sub>3</sub>. TS<sub>1</sub>:GCA1-2009 + GCA2-2010 + GCA3-2011, VS<sub>1</sub>:GCA1-2012, VS<sub>2</sub>:GCA1-2013, VS<sub>3</sub>:GCA1-2014.

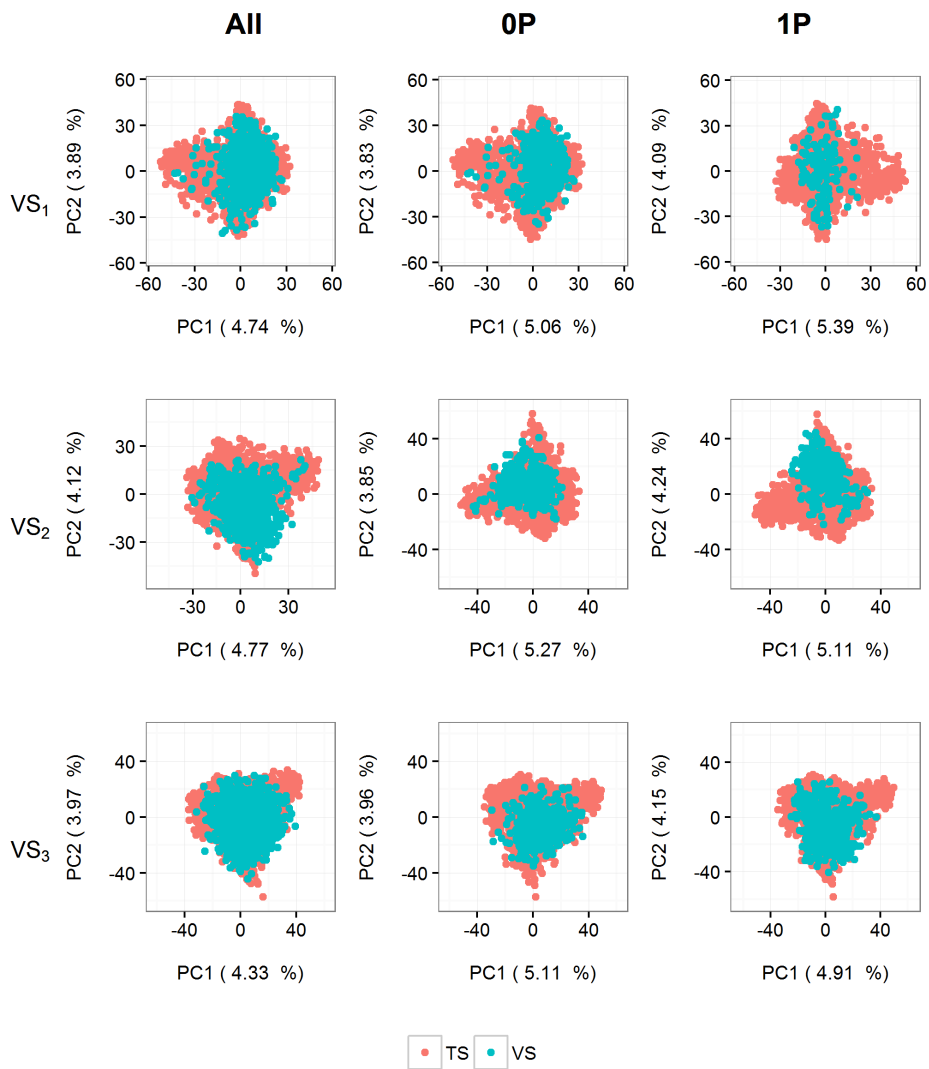

Figure S15: **Principal component (PC) plots for the German and Polish dataset between TS<sub>2</sub> and all VS.** TS<sub>2</sub> and relatedness scenarios (All-, 0P- and 1P-scenarios) for VS<sub>1</sub>, VS<sub>2</sub> and VS<sub>3</sub>. TS<sub>2</sub>:GCA1-2009 + GCA2-2010 + GCA1-2010 + GCA2-2011, VS<sub>1</sub>:GCA1-2012, VS<sub>2</sub>:GCA1-2013, VS<sub>3</sub>:GCA1-2014.

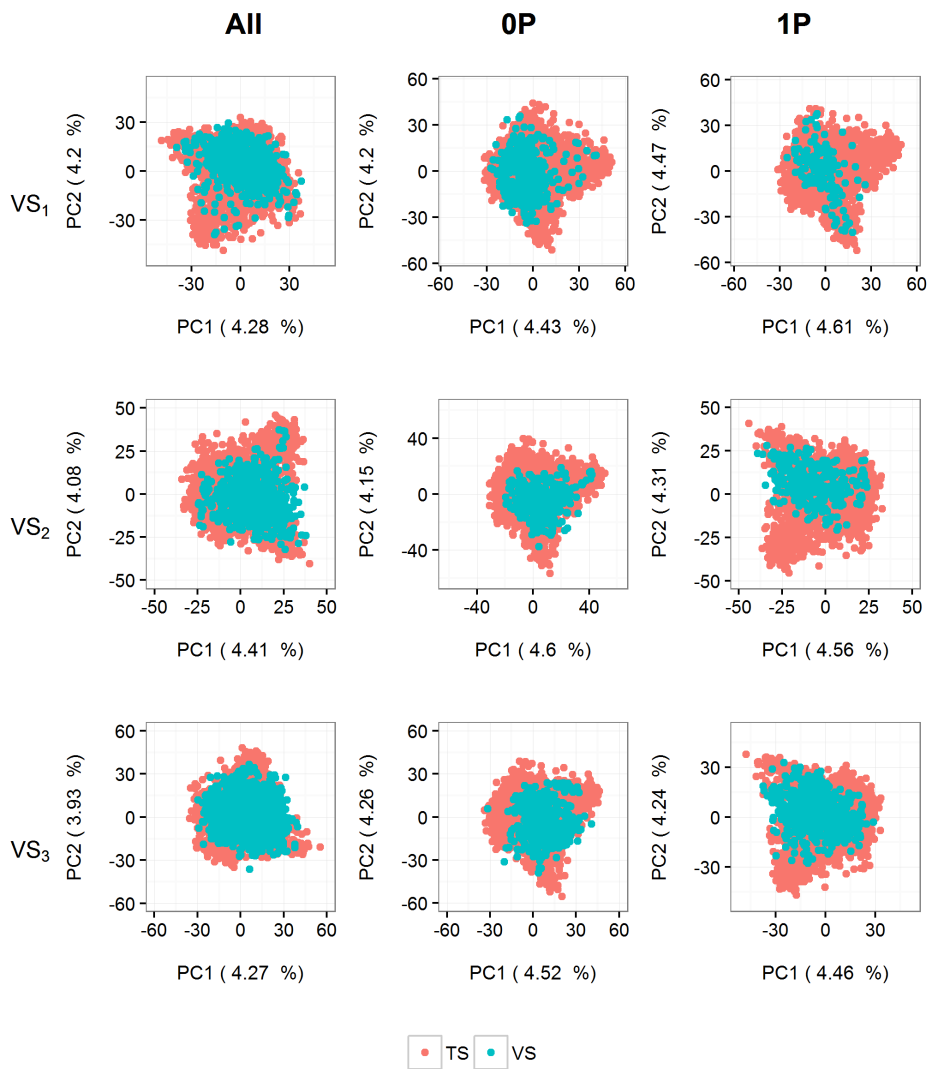

Figure S16: **Principal component (PC) plots for the German and Polish dataset between  $TS_3$  and all VS.**  $TS_3$  and relatedness scenarios (All-, 0P- and 1P-scenarios) for  $VS_1$ ,  $VS_2$  and  $VS_3$ .  $TS_3$ :GCA1-2009 + GCA2-2010 + GCA3-2011 + GCA1-2010 + GCA2-2011 + GCA3-2012 + GCA1-2011 + GCA2-2012 + GCA3-2013,  $VS_1$ :GCA1-2012,  $VS_2$ :GCA1-2013,  $VS_3$ :GCA1-2014.

## 7 Euclidean distance

Table S11: Means of Euclidean distance between all TS and VS combinations of the three datasets: German (GER), Polish (PL) and German and Polish (GER&PL), with All-, 0P- and 1P-scenarios.

|                 |     | GER&PL          |                 |                 | GER             |                 |                 | PL              |                 |                 |
|-----------------|-----|-----------------|-----------------|-----------------|-----------------|-----------------|-----------------|-----------------|-----------------|-----------------|
|                 |     | TS <sub>1</sub> | TS <sub>2</sub> | TS <sub>3</sub> | TS <sub>1</sub> | TS <sub>2</sub> | TS <sub>3</sub> | TS <sub>1</sub> | TS <sub>2</sub> | TS <sub>3</sub> |
| VS <sub>1</sub> | All | 101.089         | 101.596         | 101.847         | 99.173          | 99.524          | 100.114         | 101.977         | 102.388         | 102.533         |
|                 | 0P  | 100.923         | 101.551         | 101.854         | 98.226          | 99.073          | 99.862          | 102.339         | 102.616         | 102.749         |
|                 | 1P  | 100.080         | 101.175         | 101.590         | 97.247          | 98.536          | 99.460          | 101.774         | 102.347         | 102.609         |
| VS <sub>2</sub> | All | 100.839         | 101.453         | 101.764         | 98.168          | 98.826          | 99.624          | 102.170         | 102.726         | 102.883         |
|                 | 0P  | 100.265         | 101.187         | 101.613         | 96.860          | 98.365          | 99.368          | 102.238         | 102.654         | 102.840         |
|                 | 1P  | 100.657         | 101.428         | 101.771         | 97.543          | 98.509          | 99.452          | 102.321         | 102.781         | 102.928         |
| VS <sub>3</sub> | All | 100.162         | 100.868         | 101.222         | 98.271          | 98.815          | 99.511          | 100.783         | 101.792         | 102.039         |
|                 | 0P  | 99.758          | 100.944         | 101.387         | 95.601          | 98.076          | 99.126          | 101.879         | 102.358         | 102.562         |
|                 | 1P  | 100.417         | 101.131         | 101.511         | 97.548          | 98.800          | 99.593          | 101.687         | 102.349         | 102.544         |
